# Supplementary material
Source: PubMed Central journal article supplement (PMC7458427)
Supplement: jo0c01044_si_001.pdf [file jo0c01044_si_001.pdf]

## Supporting Information

### Sustainable synthesis of a potent and selective 5-HT<sub>7</sub> receptor antagonist using a mechanochemical approach

Vittorio Canale,<sup>a,\*</sup> Valeria Frisi,<sup>a</sup> Xavier Bantreil,<sup>b,\*</sup> Frédéric Lamaty,<sup>b</sup> Pawel Zajdel<sup>a</sup>

*<sup>a</sup>Jagiellonian University Medical College, Faculty of Pharmacy,  
Department of Medicinal Chemistry, 9 Medyczna Str., 30-688 Kraków, Poland*

*<sup>b</sup>IBMM, Univ Montpellier, CNRS, ENSCM, Montpellier, France*

\*Corresponding authors:

[vittorio.canale@uj.edu.pl](mailto:vittorio.canale@uj.edu.pl)

[xavier.bantreil@umontpellier.fr](mailto:xavier.bantreil@umontpellier.fr)

## Table of content

|                                                                                            |              |
|--------------------------------------------------------------------------------------------|--------------|
| <b>I. Calculation of green metrics.....</b>                                                | <b>SI-3</b>  |
| <b>A. Synthetic methods .....</b>                                                          | <b>SI-3</b>  |
| <b>B. Calculation of E Factor.....</b>                                                     | <b>SI-5</b>  |
| <b>C. Calculation of Ecoscale score .....</b>                                              | <b>SI-12</b> |
| <b>II. Additional experimental data for alkylation of 2-phenylphenol in ball-mill.....</b> | <b>SI-21</b> |
| <b>III. HRMS, <sup>1</sup>H- and <sup>13</sup>C-NMR spectra.....</b>                       | <b>SI-24</b> |
| <b>IV. References.....</b>                                                                 | <b>SI-46</b> |

## Index of Tables

|                                                                                            |       |
|--------------------------------------------------------------------------------------------|-------|
| TABLE S1. SUMMARY OF E FACTOR FOR THE SYNTHESIS OF PZ-1361.....                            | SI-5  |
| TABLE S2. SUMMARY OF ECOSCALE SCORE CALCULATIONS FOR THE SYNTHESIS OF PZ-1361 .....        | SI-12 |
| TABLE S3. OPTIMIZATION OF THE KIND OF BASE FOR THE ALKYLATION OF 2-PHENYLPHENOL .....      | SI-21 |
| TABLE S4. OPTIMIZATION OF MILLING TIME FOR THE ALKYLATION OF 2-PHENYLPHENOL .....          | SI-22 |
| TABLE S5. OPTIMIZATION OF THE MILLING CONDITIONS FOR THE ALKYLATION OF 2-PHENYLPHENOL..... | SI-23 |

## I. Calculation of green metrics

Different parameters can be used to evaluate the environmental impact of the different synthetic pathways. This part details the calculation of the E Factor (EF) [1] and Ecoscale score [2].

### A. Synthetic methods

Following methods were used for the calculation of the E Factor, and the Ecoscale score. Procedures in solution are described according to our previously reported publication [3].

#### Alkylation of 2-phenylphenol in solution

2-Phenylphenol (1 g, 5.87 mmol, 1 eq) and previously grinded  $K_2CO_3$  (2.03 g 14.68 mmol, 2.5 eq), KOH (0.16 g, 2.94 mmol, 0.5 eq) were suspended in 20 ml of acetone, Next, epichlorohydrin (0.57 mL, 11.74 mmol, 2 eq) was slowly dropped to the mixture which was stirred at 60°C for 24 hours. Then, the inorganic residues were filtered off and the mixture concentrated under vacuum followed by re-solubilization in  $CH_2Cl_2$  (20 ml) and washed with 2N NaOH aqueous solution (3 x 7 mL) and saturated NaCl solution (1 x 7 mL). The organic phase was dried over  $Na_2SO_4$ , filtered and concentrated under reduced pressure. The obtained crude product was purified on silica gel with ethyl acetate/hexane (1/9 v/v) as eluting system yielding intermediate **1a** as white powder (820 mg, yield 62%).

#### Alkylation of 2-phenylphenol in ball-mill

2-Phenylphenol (80.7 mg, 0.474 mmol, 1 eq) and previously grinded  $K_2CO_3$  (196.6 mg, 1.42 mmol, 3 eq) were introduced in a 35 mL PTFE jar with one stainless steel ball ( $\varnothing_{ball} = 1.5$  cm) followed by addition of epichlorohydrin (44.6  $\mu$ L, 0.569 mmol, 1.2 eq) and 2-propanol (50  $\mu$ L,  $\eta = 0.15$   $\mu$ L $\cdot$ mg $^{-1}$ ). The reaction was carried out for 140 minutes at rt. The mixture was then solubilized in  $CH_2Cl_2$  (15 mL) and the organic phase was washed with 2N NaOH aqueous solution (3 x 5 mL), saturated NaCl solution (1 x 5 mL), dried over  $Na_2SO_4$  and finally filtered and concentrated under reduced pressure yielding intermediate **1a** as white powder (91 mg, yield 85%).

#### Alkylation of 4-Boc-N-aminopiperidine in solution

4-Boc-N-aminopiperidine (0.85 g, 4.24 mmol, 1.2 eq) was dissolved in EtOH (15 mL), followed by addition of intermediate **1a** (0.8 g, 3.54 mmol, 1 eq) and the mixture was stirred under reflux for 4 hours. Inorganic residues were filtered off and organic mixture was concentrated under reduced pressure. The obtained crude product was purified using silica gel column chromatography with  $CH_2Cl_2$ /MeOH (9/1 v/v) as an eluting system yielding intermediate **3a** as white powder (1.17 g, yield 78%).

#### Alkylation of 4-Boc-N-aminopiperidine in ball-mill

Intermediate **1a** (175.1 mg, 0.774 mmol, 1 eq) and 4-Boc-amino-piperidine (154.9 mg, 0.774 mmol, 1 eq) were introduced in a 35 mL PTFE jar with one stainless steel ball ( $\varnothing_{ball} = 1.5$  cm) followed by addition of EtOH (33  $\mu$ L,  $\eta = 0.1$   $\mu$ L mg $^{-1}$ ) as liquid assistant. The reaction was carried out for 70 minutes at rt. Then, the product was solubilized in ethyl acetate (20 mL) and the organic phase was washed with  $KHSO_4$  aqueous solution at pH = 3.5 (3 x 7 mL), saturated NaCl solution (1 x 7 mL), dried over  $Na_2SO_4$  and finally filtered and concentrated under reduced pressure yielding intermediate **3a** as white powder (297 mg, yield 90%).

### General procedure for deprotection of Boc function in solution

To a solution of the intermediate **3a** (1 g, 2.35 mmol) in EtOH (35 mL), 12 mL of HCl 2N in EtOH were added. The mixture was left stirring for 6 hours at rt. The obtained white powder **4** was filtrated under vacuum and left drying overnight (832 mg, yield 98%).

### General procedure for deprotection of Boc function in solid state

Intermediate **3a** (0.5 g, 1.16 mmol) was submitted to HCl<sub>gas</sub> for 2 h at r.t., according to Scheme S1, to afford the primary amine **4** as a white hydrochloride salt (0.4 g, yield 98%).

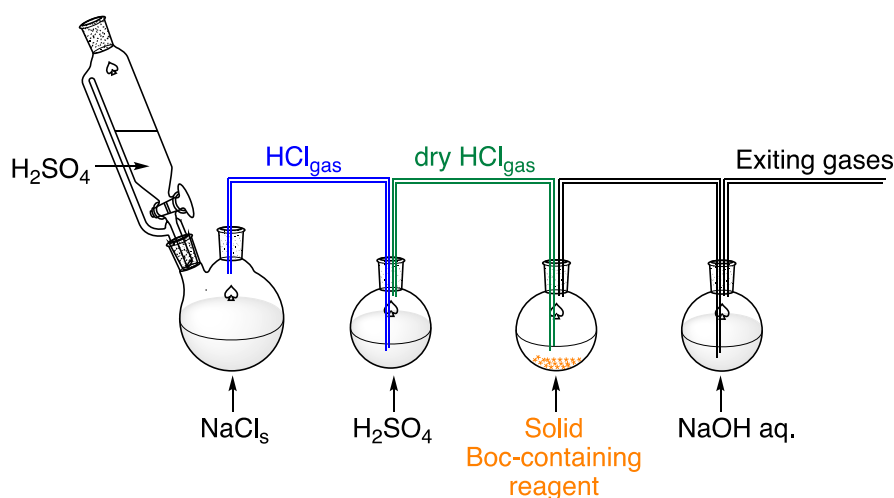

**Scheme S1.** Experimental set-up for HCl<sub>gas</sub> production and use in solid-state reaction

### Sulfonylation of primary amine in solution

A mixture of the obtained primary amine **4** (300 mg, 0.92 mmol, 1 eq) in CH<sub>2</sub>Cl<sub>2</sub> (4 mL), and TEA (0.39 mL, 2.75 mmol, 3 eq) was cooled down (ice bath), and 3-chlorobenzenesulfonyl chloride (154 μl, 1.1 mmol, 1.2 eq) was added in one portion. The reaction mixture was stirred for 2 hours under cooling. Then, the solvent was evaporated, and the crude mixture was purified using silica gel column chromatography with CH<sub>2</sub>Cl<sub>2</sub>/MeOH (9/0.5 v/v) as an eluting system yielding final compound **5a** as white powder (330 mg, yield 72%).

### Sulfonylation of primary amine in ball-mill

Intermediate **4** (168.2 mg, 0.463 mmol, 1 eq), 3-chlorobenzenesulfonyl chloride (65.24 μL, 0.463 mmol, 1 eq), and previously grinded K<sub>2</sub>CO<sub>3</sub> (64.0 mg, 0.463, 1 eq) were introduced in a 35 mL PTFE jar with one stainless steel ball ( $\varnothing_{\text{ball}} = 1.5$  cm). The reaction was carried out for 1 min at rt. Then, the crude mixture was solubilized in ethyl acetate (20 mL) and the organic phase was washed with KHSO<sub>4</sub> aqueous solution at pH = 3.5 (3 x 7 mL), saturated NaCl solution (1 x 7 mL), dried over Na<sub>2</sub>SO<sub>4</sub> and finally filtered and concentrated under vacuum yielding final compound **5a** (**PZ-1361**) as white powder (200.1 mg, yield 86%).

## B. Calculation of E Factor

The E Factor is the ratio of the weight of generated waste to the total weight of the end product. It is a useful tool for rapid evaluation of processes based on generated waste.

$$EF = \frac{\sum m(\text{Raw materials}) + \sum m(\text{solvent}) + \sum m(\text{water}) - m(\text{products})}{m(\text{products})}$$

E factor values are reported in the following tables for the synthesis of **PZ-1361** (final compound **5a**) in the ball-mill and magnetic stirrer conditions. A summary is given in Table S1.

**Table S1.** Summary of E factor for the synthesis of **PZ-1361**

|                    | <b>E factor</b>              |                                       |                  |               |
|--------------------|------------------------------|---------------------------------------|------------------|---------------|
|                    | <b>Step 1</b>                | <b>Step 2</b>                         | <b>Step 3</b>    | <b>Step 4</b> |
|                    | Alkylation of 2-Phenylphenol | Alkylation of 4-Boc-N-aminopiperidine | Boc deprotection | Sulfonylation |
| <b>Solution</b>    | 509                          | 554                                   | 46               | 804           |
| <b>Solid-state</b> | 548                          | <b>181</b>                            | <b>2</b>         | <b>230</b>    |

The E factor values were also calculated for the whole synthesis of PZ-1361, starting from 1 g of 2-Phenylphenol. All the quantities were then calculated according to the equivalents and yield obtained in each step. The following values were calculated:

|                    | <b>E factor</b> |
|--------------------|-----------------|
| <b>Solution</b>    | 1932            |
| <b>Solid-state</b> | <b>715</b>      |

### Alkylation of 2-phenylphenol in solution

| Reagents            | CAS       | Molecular Formula | M(g/mol) | m(g)   | V (mL) | n (mmoles) | d     | eq  |
|---------------------|-----------|-------------------|----------|--------|--------|------------|-------|-----|
| 2-phenylphenol      | 90-43-7   | C12H10O           | 170.21   | 0.999  |        | 5.87       |       | 1   |
| acetone             | 67-64-1   | C3H6O             | 58.08    | 15.820 | 20.000 |            | 0.791 |     |
| potassium carbonate | 584-08-7  | K2CO3             | 138.21   | 2.03   |        | 14.68      |       | 2.5 |
| potassium hydroxide | 1310-58-3 | KOH               | 56.11    | 0.165  |        | 2.935      |       | 0.5 |
| epichlorhydrin      | 106-89-8  | C3H5ClO           | 92.52    | 1.086  | 0.918  | 11.74      | 1.183 | 2   |
| <i>Extraction</i>   |           |                   |          |        |        |            |       |     |
| dichloromethane     | 75-09-2   | CH2Cl2            | 84.93    | 26.500 | 20.000 |            | 1.325 |     |
| sodium hydroxide    | 1310-73-2 | NaOH              | 40       | 1.680  |        | 42         |       |     |
| sodium chloride     | 7647-14-5 | NaCl              | 58.44    | 1.82   |        |            |       |     |
| water               | 7732-18-5 | H2O               | 18       | 26.18  |        | 1454.44    |       |     |
| <i>Purification</i> |           |                   |          |        |        |            |       |     |
| ethyl acetate       | 141-78-6  | C4H8O2            | 88.11    | 45.10  | 50     | 511.86     | 0.902 |     |
| hexane              | 110-54-3  | C6H14             | 86.18    | 296.55 | 450    | 3441.05    | 0.659 |     |

| product                     | m (g) | M (g/mol) | yield |
|-----------------------------|-------|-----------|-------|
| alkylated 2-phenylphenol 1a | 0.82  | 226.28    | 0.62  |

|          |                   | m (g)                             |                      |
|----------|-------------------|-----------------------------------|----------------------|
| E-factor | Product           | alkylated 2-phenylphenol 1a 0.820 |                      |
|          | Reagents          | 2-phenylphenol                    | 0.999                |
|          |                   | acetone                           | 15.820               |
|          |                   | potassium carbonate               | 2.028                |
|          |                   | potassium hydroxide               | 0.165                |
|          |                   | epichlorhydrin                    | 1.086                |
|          |                   | dichloromethane                   | 26.500               |
|          |                   | sodium hydroxide                  | 1.680                |
|          |                   | sodium chloride                   | 1.820                |
|          |                   | water                             | 26.180               |
|          |                   | ethyl acetate                     | 45.100               |
|          | hexane            | 296.55                            |                      |
|          | <b>E-factor =</b> |                                   | 417.11 / 0.820 = 509 |

### Alkylation of 2-phenylphenol in ball-mill

| Reagents            | CAS       | Molecular Formula | M(g/mol) | m(g)   | V (mL) | n (mmoles) | d     | eq  |
|---------------------|-----------|-------------------|----------|--------|--------|------------|-------|-----|
| 2-phenylphenol      | 90-43-7   | C12H10O           | 170.21   | 0.081  |        | 0.474      |       | 1   |
| potassium carbonate | 584-08-7  | K2CO3             | 138.21   | 0.20   |        | 1.42       |       | 3   |
| epichlorhydrin      | 106-89-8  | C3H5ClO           | 92.52    | 0.053  | 0.044  | 0.5688     | 1.183 | 1.2 |
| iso propanol        | 67-63-0   | C3H8O             | 60.1     | 0.039  | 0.050  |            | 0.785 |     |
| <i>Extraction</i>   |           |                   |          |        |        |            |       |     |
| dichloromethane     | 75-09-2   | CH2Cl2            | 84.93    | 19.875 | 15.000 |            | 1.325 |     |
| sodium hydroxide    | 1310-73-2 | NaOH              | 40       | 1.680  |        | 42         |       |     |
| sodium chloride     | 7647-14-5 | NaCl              | 58.44    | 1.82   |        |            |       |     |
| water               | 7732-18-5 | H2O               | 18       | 26.18  |        | 1454.444   |       |     |

| product                  | m (g) | M (g/mol) | yield |
|--------------------------|-------|-----------|-------|
| alkylated 2-phenylphenol | 0.091 | 226.28    | 0.85  |

|          |          | m (g)                             |        |                     |
|----------|----------|-----------------------------------|--------|---------------------|
| E-factor | Product  | alkylated 2-phenylphenol 1a 0.091 |        |                     |
|          | Reagents | 2-phenylphenol                    | 0.081  |                     |
|          |          | potassium carbonate               | 0.197  |                     |
|          |          | epichlorhydrin                    | 0.053  |                     |
|          |          | iso propanol                      | 0.039  |                     |
|          |          | dichloromethane                   | 19.875 |                     |
|          |          | sodium hydroxide                  | 1.680  |                     |
|          |          | sodium chloride                   | 1.820  |                     |
|          |          | water                             | 26.180 |                     |
|          |          | <b>E-factor =</b>                 |        | 49.83 / 0.091 = 548 |

### Alkylation of 4-Boc-N-aminopiperidine in solution

| Reagents                    | CAS        | Molecular Formula                                             | M(g/mol) | m(g)    | V (mL) | n (mmoles) | d     | eq  |
|-----------------------------|------------|---------------------------------------------------------------|----------|---------|--------|------------|-------|-----|
| alkylated 2-phenylphenol 1a |            |                                                               | 226.28   | 0.801   |        | 3.54       |       | 1   |
| ethanol                     | 64-17-5    | C <sub>2</sub> H <sub>6</sub> O                               | 46.07    | 11.835  | 15.0   |            | 0.789 |     |
| 4-boc-N-aminopiperidine     | 73874-95-0 | C <sub>10</sub> H <sub>20</sub> N <sub>2</sub> O <sub>2</sub> | 200.28   | 0.85    |        | 4.25       |       | 1.2 |
| <i>Purification</i>         |            |                                                               |          |         |        |            |       |     |
| dichloromethane             | 75-09-2    | CH <sub>2</sub> Cl <sub>2</sub>                               | 84.93    | 596.250 | 450.0  | 7020.5     | 1.325 |     |
| methanol                    | 67-56-1    | CH <sub>4</sub> O                                             | 32.04    | 39.550  | 50.0   | 1234.4     | 0.791 |     |

| product              | m (g) | M (g/mol) | yield |
|----------------------|-------|-----------|-------|
| amination product 3a | 1.17  | 426.56    | 0.77  |

|                   |          | m (g)                       |         |       |   |            |
|-------------------|----------|-----------------------------|---------|-------|---|------------|
| E-factor          | Product  | amination product 3a        | 1.170   |       |   |            |
|                   | Reagents | alkylated 2-phenylphenol 1a | 0.801   |       |   |            |
|                   |          | ethanol                     | 11.835  |       |   |            |
|                   |          | 4-boc-N-aminopiperidine     | 0.851   |       |   |            |
|                   |          | dichloromethane             | 596.250 |       |   |            |
|                   |          | methanol                    | 39.550  |       |   |            |
| <b>E-factor =</b> |          | 648.12                      | /       | 1.170 | = | <b>554</b> |

### Alkylation of 4-Boc-N-aminopiperidine in ball-mill

| Reagents                    | CAS        | Molecular Formula                                             | M(g/mol) | m(g)      | V (mL) | n (mmoles) | d     | eq |
|-----------------------------|------------|---------------------------------------------------------------|----------|-----------|--------|------------|-------|----|
| alkylated 2-phenylphenol 1a |            |                                                               | 226.28   | 0.175     |        | 0.774      |       | 1  |
| ethanol                     | 64-17-5    | C <sub>2</sub> H <sub>6</sub> O                               | 46.07    | 0.026     | 0.033  |            | 0.789 |    |
| 4-boc-N-aminopiperidine     | 73874-95-0 | C <sub>10</sub> H <sub>20</sub> N <sub>2</sub> O <sub>2</sub> | 200.28   | 0.155     |        | 0.774      |       | 1  |
| <i>Extraction</i>           |            |                                                               |          |           |        |            |       |    |
| ethyl acetate               | 141-78-6   | C <sub>4</sub> H <sub>8</sub> O <sub>2</sub>                  | 88.11    | 18.04     | 20     | 204.74     | 0.902 |    |
| potassium bisulfate         | 7646-93-7  | KHSO <sub>4</sub>                                             | 136.17   | 0.0002860 |        | 0.00210    |       |    |
| sodium chloride             | 7647-14-5  | NaCl                                                          | 58.44    | 1.82      |        |            |       |    |
| water                       | 7732-18-5  | H <sub>2</sub> O                                              | 18       | 26.18     |        | 1454.444   |       |    |

| product              | m (g) | M (g/mol) | yield |
|----------------------|-------|-----------|-------|
| amination product 3a | 0.297 | 426.56    | 0.90  |

|                   |          | m (g)                       |          |       |   |            |
|-------------------|----------|-----------------------------|----------|-------|---|------------|
| E-factor          | Product  | amination product 3a        | 0.297    |       |   |            |
|                   | Reagents | alkylated 2-phenylphenol 1a | 0.053    |       |   |            |
|                   |          | ethanol                     | 7.902    |       |   |            |
|                   |          | 4-boc-N-aminopiperidine     | 0.047    |       |   |            |
|                   |          | ethyl acetate               | 18.040   |       |   |            |
|                   |          | potassium bisulfate         | 0.000286 |       |   |            |
|                   |          | sodium chloride             | 1.820    |       |   |            |
|                   |          | water                       | 26.180   |       |   |            |
| <b>E-factor =</b> |          | 53.74                       | /        | 0.297 | = | <b>181</b> |

### Deprotection of Boc function in solution

| Reagents                     | CAS       | Molecular Formula               | M(g/mol) | m(g)   | V (mL) | n (mmoles) | d     | eq   |
|------------------------------|-----------|---------------------------------|----------|--------|--------|------------|-------|------|
| Intermediate 3a              |           |                                 | 426.56   | 1.002  |        | 2.35       |       | 1    |
| ethanol                      | 64-17-5   | C <sub>2</sub> H <sub>6</sub> O | 46.07    | 37.083 | 47.0   |            | 0.789 |      |
| Hydrochloric acid 2N in EtOH | 7647-01-0 | HCl                             | 36.46    | 0.88   |        | 24.00      |       | 10.2 |

| product        | m (g) | M (g/mol) | yield |
|----------------|-------|-----------|-------|
| Intermediate 4 | 0.832 | 362.9     | 0.98  |

|                   |          | m (g)                        |        |       |   |           |
|-------------------|----------|------------------------------|--------|-------|---|-----------|
| E-factor          | Product  | Amine 4                      | 0.832  |       |   |           |
|                   | Reagents | Intermediate 3a              | 1.002  |       |   |           |
|                   |          | ethanol                      | 37.083 |       |   |           |
|                   |          | Hydrochloric acid 2N in EtOH | 0.875  |       |   |           |
| <b>E-factor =</b> |          | 38.13                        | /      | 0.832 | = | <b>46</b> |

### Deprotection of Boc function in solid state

| Reagents              | CAS       | Molecular Formula | M(g/mol) | m(g)  | V (mL) | n (mmoles) | d | eq   |
|-----------------------|-----------|-------------------|----------|-------|--------|------------|---|------|
| Intermediate 3a       |           |                   | 426.56   | 0.495 |        | 1.16       |   | 1    |
| Hydrochloric acid gas | 7647-01-0 | HCl               | 36.46    | 0.43  |        | 11.83      |   | 10.2 |

| product        | m (g) | M (g/mol) | yield |
|----------------|-------|-----------|-------|
| Intermediate 4 | 0.412 | 362.9     | 0.98  |

E-factor

|            |                 | m (g)            |
|------------|-----------------|------------------|
| Product    | Amine 4         | 0.412            |
| Reagents   | Intermediate 3a | 1.002            |
|            | HCl             | 0.430            |
| E-factor = |                 | 1.02 / 0.412 = 2 |

### Sulfonylation of primary amine in solution

| Reagents                         | CAS        | Molecular Formula                                             | M(g/mol) | m(g)    | V (mL)  | n (mmoles) | d     | eq  |
|----------------------------------|------------|---------------------------------------------------------------|----------|---------|---------|------------|-------|-----|
| amine 4                          |            |                                                               | 362.9    | 0.334   |         | 0.92       |       | 1   |
| dichloromethane                  | 75-09-2    | CH <sub>2</sub> Cl <sub>2</sub>                               | 84.93    | 5.300   | 4.000   |            | 1.325 |     |
| triethylamine                    | 121-44-8   | (C <sub>2</sub> H <sub>5</sub> ) <sub>3</sub> N               | 101.19   | 0.28    | 0.385   | 2.76       | 0.726 | 3   |
| 3-chlorobenzenesulfonyl chloride | #2888-06-4 | C <sub>6</sub> H <sub>4</sub> SO <sub>2</sub> Cl <sub>2</sub> | 211.07   | 0.233   | 0.155   | 1.104      | 1.499 | 1.2 |
| <i>Purification</i>              |            |                                                               |          |         |         |            |       |     |
| CH <sub>2</sub> Cl <sub>2</sub>  | 75-09-2    | CH <sub>2</sub> Cl <sub>2</sub>                               | 84.93    | 251.750 | 190.000 |            | 1.325 |     |
| MeOH                             | 67-56-1    | CH <sub>4</sub> O                                             | 32.04    | 7.920   | 10      |            | 0.792 |     |

| product                     | m (g) | M (g/mol) | yield |
|-----------------------------|-------|-----------|-------|
| final compound 5a (PZ-1361) | 0.33  | 501.04    | 0.72  |

E-factor

|            |                                  | m (g)                |
|------------|----------------------------------|----------------------|
| Product    | final compound 5a                | 0.330                |
| Reagents   | amine 4                          | 0.300                |
|            | dichloromethane                  | 5.300                |
|            | triethylamine                    | 0.279                |
|            | 3-chlorobenzenesulfonyl chloride | 0.233                |
|            | CH <sub>2</sub> Cl <sub>2</sub>  | 251.750              |
|            | MeOH                             | 7.920                |
| E-factor = |                                  | 265.45 / 0.330 = 804 |



*Sulfonylation of primary amine in ball-mill*

| Reagents                         | CAS        | Molecular Formula                                             | M(g/mol) | m(g)      | V (mL) | n (mmoles) | d     | eq |
|----------------------------------|------------|---------------------------------------------------------------|----------|-----------|--------|------------|-------|----|
| amine 4                          |            |                                                               | 362.9    | 0.168     |        | 0.463      |       | 1  |
| potassium carbonate              | 584-08-7   | K <sub>2</sub> CO <sub>3</sub>                                | 138.21   | 0.064     |        | 0.46       |       | 1  |
| 3-chlorobenzenesulfonyl chloride | #2888-06-4 | C <sub>6</sub> H <sub>4</sub> SO <sub>2</sub> Cl <sub>2</sub> | 211.07   | 0.098     | 0.065  | 0.463      | 1.499 | 1  |
| <i>Extraction</i>                |            |                                                               |          |           |        |            |       |    |
| ethyl acetate                    | 141-78-6   | C <sub>4</sub> H <sub>8</sub> O <sub>2</sub>                  | 88.11    | 18.04     | 20     | 204.74     | 0.902 |    |
| potassium bisulfate              | 7646-93-7  | KHSO <sub>4</sub>                                             | 136.17   | 0.0002860 |        | 0.00210    |       |    |
| sodium chloride                  | 7647-14-5  | NaCl                                                          | 58.44    | 1.82      |        |            |       |    |
| water                            | 7732-18-5  | H <sub>2</sub> O                                              | 18       | 26.18     |        | 1454.444   |       |    |

| product                     | m (g)  | M (g/mol) | yield |
|-----------------------------|--------|-----------|-------|
| final compound 5a (PZ-1361) | 0.2001 | 501.04    | 0.86  |

|                   |          | m (g)                        |          |
|-------------------|----------|------------------------------|----------|
| E-factor          | Product  | final compound 5a            |          |
|                   |          | 0.200                        |          |
|                   | Reagents | amine 4                      | 0.046    |
|                   |          | potassium carbonate          | 0.019    |
|                   |          | 3-chlorobenzenesulfonyl chlo | 0.030    |
|                   |          | ethyl acetate                | 18.040   |
|                   |          | potassium bisulfate          | 0.000286 |
|                   |          | sodium chloride              | 1.820    |
| water             | 26.180   |                              |          |
| <b>E-factor =</b> |          | 45.93 / 0.200 = <b>230</b>   |          |

# Total synthesis of PZ-1361(5a) in solution

## Total synthesis of PZ-1361

### Step 1

#### Alkylation

| Reagents            | CAS       | Molecular Formula                            | M(g/mol) | m(g)   | V (mL) | n (mmoles) | d     | eq    |
|---------------------|-----------|----------------------------------------------|----------|--------|--------|------------|-------|-------|
| 2-phenylphenol      | 90-43-7   | C <sub>12</sub> H <sub>10</sub> O            | 170.21   | 0.999  |        | 5.87       |       | 1     |
| acetone             | 67-64-1   | C <sub>3</sub> H <sub>6</sub> O              | 58.08    | 15.819 | 19.999 | 272.37     | 0.791 | 46.4  |
| potassium carbonate | 584-08-7  | K <sub>2</sub> CO <sub>3</sub>               | 138.21   | 2.03   |        | 14.68      |       | 2.5   |
| potassium hydroxide | 1310-58-3 | KOH                                          | 56.11    | 0.165  |        | 2.935      |       | 0.5   |
| epichlorohydrin     | 106-89-8  | C <sub>3</sub> H <sub>5</sub> ClO            | 92.52    | 1.086  | 0.918  | 11.74      | 1.183 | 2     |
| <i>Extraction</i>   |           |                                              |          |        |        |            |       |       |
| dichloromethane     | 75-09-2   | CH <sub>2</sub> Cl <sub>2</sub>              | 84.93    | 26.522 | 20.000 | 312.28     | 1.325 | 53.2  |
| sodium hydroxide    | 1310-73-2 | NaOH                                         | 40       | 1.691  |        | 42.26      |       | 7.2   |
| sodium chloride     | 7647-14-5 | NaCl                                         | 58.44    | 1.82   |        | 31.11      |       | 5.3   |
| water               | 7732-18-5 | H <sub>2</sub> O                             | 18       | 26.18  |        | 1454.59    |       | 247.8 |
| <i>Purification</i> |           |                                              |          |        |        |            |       |       |
| ethyl acetate       | 141-78-6  | C <sub>4</sub> H <sub>8</sub> O <sub>2</sub> | 88.11    | 45.10  | 50     | 511.86     | 0.902 | 87.2  |
| hexane              | 110-54-3  | C <sub>6</sub> H <sub>14</sub>               | 86.18    | 296.54 | 450    | 3440.99    | 0.659 | 586.2 |

| product                     | m (g) | M (g/mol) | yield |
|-----------------------------|-------|-----------|-------|
| alkylated 2-phenylphenol 1a | 0.82  | 226.28    | 0.62  |

### Step 2

#### Amination

| Reagents                    | CAS        | Molecular Formula                                             | M(g/mol) | m(g)    | V (mL) | n (mmoles) | d     | eq     |
|-----------------------------|------------|---------------------------------------------------------------|----------|---------|--------|------------|-------|--------|
| alkylated 2-phenylphenol 1a |            |                                                               | 226.28   | 0.824   |        | 3.64       |       | 1      |
| ethanol                     | 64-17-5    | C <sub>2</sub> H <sub>6</sub> O                               | 46.07    | 12.168  | 15.0   | 264.11     | 0.789 | 72.57  |
| 4-boc-N-aminopiperidine     | 73874-95-0 | C <sub>10</sub> H <sub>20</sub> N <sub>2</sub> O <sub>2</sub> | 200.28   | 0.87    |        | 4.37       |       | 1.2    |
| <i>Purification</i>         |            |                                                               |          |         |        |            |       |        |
| dichloromethane             | 75-09-2    | CH <sub>2</sub> Cl <sub>2</sub>                               | 84.93    | 612.996 | 450.0  | 7217.7     | 1.325 | 1983.2 |
| methanol                    | 67-56-1    | CH <sub>4</sub> O                                             | 32.04    | 40.661  | 50.0   | 1269.1     | 0.791 | 348.7  |

| product              | m (g) | M (g/mol) | yield |
|----------------------|-------|-----------|-------|
| amination product 3a | 1.21  | 426.56    | 0.78  |

### Step 3

#### Boc removal

| Reagents                     | CAS       | Molecular Formula               | M(g/mol) | m(g)   | V (mL) | n (mmoles) | d     | eq     |
|------------------------------|-----------|---------------------------------|----------|--------|--------|------------|-------|--------|
| Intermediate 3a              |           |                                 | 426.56   | 1.211  |        | 2.84       |       | 1      |
| ethanol                      | 64-17-5   | C <sub>2</sub> H <sub>6</sub> O | 46.07    | 44.795 | 47.0   | 972.32     | 0.789 | 342.52 |
| hydrochloric acid 2N in EtOH | 7647-01-0 | HCl                             | 36.46    | 1.05   |        | 28.96      |       | 10.2   |

| product        | m (g) | M (g/mol) | yield |
|----------------|-------|-----------|-------|
| Intermediate 4 | 1.01  | 362.9     | 0.98  |

### Step 4

#### Sulfonylation

| Reagents                         | CAS        | Molecular Formula                                             | M(g/mol) | m(g)    | V (mL)  | n (mmoles) | d     | eq     |
|----------------------------------|------------|---------------------------------------------------------------|----------|---------|---------|------------|-------|--------|
| amine 4                          |            |                                                               | 362.9    | 1.010   |         | 2.78       |       | 1      |
| dichloromethane                  | 75-09-2    | CH <sub>2</sub> Cl <sub>2</sub>                               | 84.93    | 16.019  | 4.000   | 188.617    | 1.325 | 67.8   |
| triethylamine                    | 121-44-8   | (C <sub>2</sub> H <sub>5</sub> ) <sub>3</sub> N               | 101.19   | 0.84    | 1.163   | 8.35       | 0.726 | 3      |
| 3-chlorobenzenesulfonyl chloride | #2888-06-4 | C <sub>6</sub> H <sub>4</sub> SO <sub>2</sub> Cl <sub>2</sub> | 211.07   | 0.705   | 0.470   | 3.33834883 | 1.499 | 1.2    |
| <i>Purification</i>              |            |                                                               |          |         |         |            |       |        |
| CH <sub>2</sub> Cl <sub>2</sub>  | 75-09-2    | CH <sub>2</sub> Cl <sub>2</sub>                               | 84.93    | 761.267 | 190.000 | 8963.467   | 1.325 | 3222.0 |
| MeOH                             | 67-56-1    | CH <sub>4</sub> O                                             | 32.04    | 23.950  | 10      | 747.512    | 0.792 | 268.7  |

| product                     | m (g) | M (g/mol) | yield |
|-----------------------------|-------|-----------|-------|
| final compound 5a (PZ-1361) | 1.00  | 501.04    | 0.72  |

| product                     | m (g) | M (g/mol) | yield |
|-----------------------------|-------|-----------|-------|
| final compound 5a (PZ-1361) | 1.000 | 501.04    | 0.34  |

| E-factor                        | Product                          |         | m (g) |   |      |
|---------------------------------|----------------------------------|---------|-------|---|------|
|                                 | final compound 5a (PZ-1361)      |         |       |   |      |
| Reagents                        | 2-phenylphenol                   | 0.999   |       |   |      |
|                                 | acetone                          | 15.819  |       |   |      |
|                                 | potassium carbonate              | 2.028   |       |   |      |
|                                 | potassium hydroxide              | 0.165   |       |   |      |
|                                 | epichlorohydrin                  | 1.086   |       |   |      |
|                                 | dichloromethane                  | 26.522  |       |   |      |
|                                 | sodium hydroxide                 | 1.691   |       |   |      |
|                                 | sodium chloride                  | 1.818   |       |   |      |
|                                 | water                            | 26.183  |       |   |      |
|                                 | ethyl acetate                    | 45.100  |       |   |      |
|                                 | hexane                           | 296.54  |       |   |      |
|                                 | ethanol                          | 12.168  |       |   |      |
|                                 | 4-boc-N-aminopiperidine          | 0.875   |       |   |      |
|                                 | dichloromethane                  | 612.996 |       |   |      |
|                                 | methanol                         | 40.661  |       |   |      |
|                                 | ethanol                          | 44.795  |       |   |      |
|                                 | hydrochloric acid 2N in EtOH     | 1.056   |       |   |      |
|                                 | dichloromethane                  | 16.019  |       |   |      |
|                                 | triethylamine                    | 0.845   |       |   |      |
|                                 | 3-chlorobenzenesulfonyl chloride | 0.705   |       |   |      |
| CH <sub>2</sub> Cl <sub>2</sub> | 761.267                          |         |       |   |      |
| MeOH                            | 23.950                           |         |       |   |      |
| <b>E-factor =</b>               | 1932.29                          | /       | 1.000 | = | 1932 |

## Total synthesis of PZ-1361(5a) in solid state

### Total synthesis of PZ-1361

#### Step 1

##### Alkylation

| Reagents            | CAS       | Molecular Formula | M(g/mol) | m(g)   | V (mL) | n (mmoles) | d     | eq     |
|---------------------|-----------|-------------------|----------|--------|--------|------------|-------|--------|
| 2-phenylphenol      | 90-43-7   | C12H10O           | 170.21   | 0.081  |        | 0.474      |       | 1      |
| potassium carbonate | 584-08-7  | K2CO3             | 138.21   | 0.20   |        | 1.4220     |       | 3      |
| epichlorohydrin     | 106-89-8  | C3H5ClO           | 92.52    | 0.053  | 0.044  | 0.5688     | 1.183 | 1.2    |
| iso propanol        | 67-63-0   | C3H8O             | 60.1     | 0.039  | 0.050  |            |       | 0.785  |
| Extraction          |           |                   |          |        |        |            |       |        |
| dichloromethane     | 75-09-2   | CH2Cl2            | 84.93    | 19.875 | 15.000 | 234.0138   | 1.325 | 493.7  |
| sodium hydroxide    | 1310-73-2 | NaOH              | 40       | 1.680  |        | 41.9964    |       | 88.6   |
| sodium chloride     | 7647-14-5 | NaCl              | 58.44    | 1.82   |        | 31.1418    |       | 65.7   |
| water               | 7732-18-5 | H2O               | 18       | 26.18  |        | 1454.4690  |       | 3068.5 |

| product                     | m (g) | M (g/mol) | yield |
|-----------------------------|-------|-----------|-------|
| alkylated 2-phenylphenol 1a | 0.091 | 226.28    | 0.85  |

#### Step 2

##### Amination

| Reagents                    | CAS        | Molecular Formula | M(g/mol) | m(g)      | V (mL) | n (mmoles) | d     | eq       |
|-----------------------------|------------|-------------------|----------|-----------|--------|------------|-------|----------|
| alkylated 2-phenylphenol 1a |            |                   | 226.28   | 0.091     |        | 0.402      |       | 1        |
| ethanol                     | 64-17-5    | C2H6O             | 46.07    | 0.014     |        | 0.294      | 0.789 | 0.73     |
| 4-boc-N-aminopiperidine     | 73874-95-0 | C10H20N2O2        | 200.28   | 0.081     |        | 0.402      |       | 1        |
| Extraction                  |            |                   |          |           |        |            |       |          |
| ethyl acetate               | 141-78-6   | C4H8O2            | 88.11    | 9.37      | 10.391 | 106.37     | 0.902 | 264.5    |
| potassium bisulfate         | 7646-93-7  | KHSO4             | 136.17   | 0.0001486 |        | 0.0011     |       | 0.002713 |
| sodium chloride             | 7647-14-5  | NaCl              | 58.44    | 0.945     |        | 16.17      |       | 40.2     |
| water                       | 7732-18-5  | H2O               | 18       | 13.602    |        | 755.69     |       | 1879.1   |

| product              | m (g) | M (g/mol) | yield |
|----------------------|-------|-----------|-------|
| amination product 3a | 0.154 | 426.56    | 0.90  |

#### Step 3

##### Boc removal

| Reagents              | CAS       | Molecular Formula | M(g/mol) | m(g)  | V (mL) | n (mmoles) | d | eq   |
|-----------------------|-----------|-------------------|----------|-------|--------|------------|---|------|
| intermediate 3a       |           |                   | 426.56   | 0.154 |        | 0.362      |   | 1    |
| hydrochloric acid gas | 7647-01-0 | HCl               | 36.46    | 0.135 |        | 3.69       |   | 10.2 |

| product         | m (g) | M (g/mol) | yield |
|-----------------|-------|-----------|-------|
| intermediate 4a | 0.129 | 362.9     | 0.98  |

#### Step 4

##### Sulfonation

| Reagents                         | CAS        | Molecular Formula | M(g/mol) | m(g)      | V (mL) | n (mmoles) | d     | eq       |
|----------------------------------|------------|-------------------|----------|-----------|--------|------------|-------|----------|
| amine 4                          |            |                   | 362.9    | 0.129     |        | 0.355      |       | 1        |
| potassium carbonate              | 584-08-7   | K2CO3             | 138.21   | 0.049     |        | 0.355      |       | 1        |
| 3-chlorobenzenesulfonyl chloride | #2888-06-4 | C6H4SO2Cl2        | 211.07   | 0.075     | 0.050  | 0.355      | 1.499 | 1        |
| Extraction                       |            |                   |          |           |        |            |       |          |
| ethyl acetate                    | 141-78-6   | C4H8O2            | 88.11    | 13.82     | 15.3   | 156.85     | 0.902 | 442.2    |
| potassium bisulfate              | 7646-93-7  | KHSO4             | 136.17   | 0.0002191 |        | 0.00161    |       | 0.004536 |
| sodium chloride                  | 7647-14-5  | NaCl              | 58.44    | 1.40      |        | 23.871     |       | 67.3     |
| water                            | 7732-18-5  | H2O               | 18       | 20.057    |        | 1114.261   |       | 3141.4   |

| product                     | m (g) | M (g/mol) | yield |
|-----------------------------|-------|-----------|-------|
| final compound 5a (PZ-1361) | 0.153 | 501.04    | 0.86  |

| product                     | m (g) | M (g/mol) | Overall yield |
|-----------------------------|-------|-----------|---------------|
| final compound 5a (PZ-1361) | 0.153 | 501.04    | 0.64          |

|            |          | m (g)                         |
|------------|----------|-------------------------------|
| E-factor   | Product  | alkylated 2-phenylphenol 1a   |
|            |          | 0.153                         |
|            | Reagents | 2-phenylphenol                |
|            |          | 0.081                         |
|            |          | potassium carbonate           |
|            |          | 0.197                         |
|            |          | epichlorohydrin               |
|            |          | 0.053                         |
|            |          | iso propanol                  |
|            |          | 0.039                         |
|            |          | dichloromethane               |
|            |          | 19.875                        |
|            |          | sodium hydroxide              |
|            |          | 1.680                         |
|            |          | sodium chloride               |
|            |          | 1.820                         |
|            |          | water                         |
|            |          | 26.180                        |
|            |          | ethanol                       |
|            |          | 0.014                         |
|            |          | 4-boc-N-aminopiperidine       |
|            |          | 0.081                         |
|            |          | ethyl acetate                 |
|            |          | 9.372                         |
|            |          | potassium bisulfate           |
|            |          | 0.000149                      |
|            |          | sodium chloride               |
|            |          | 0.945                         |
|            |          | water                         |
|            |          | 13.602                        |
|            |          | HCl                           |
|            |          | 0.135                         |
|            |          | potassium carbonate           |
|            |          | 0.049                         |
|            |          | 3-chlorobenzenesulfonyl chlor |
|            |          | 0.075                         |
|            |          | ethyl acetate                 |
|            |          | 13.820                        |
|            |          | potassium bisulfate           |
|            |          | 0.000219                      |
|            |          | sodium chloride               |
|            |          | 1.395                         |
|            |          | water                         |
|            |          | 20.057                        |
| E-factor = | 109.32   | /                             |
|            | 0.153    | =                             |
|            |          | 715                           |

### C. Calculation of Ecoscale score

According to Van Aken *et al.*: "The Ecoscale tool uses a scale from 0 to 100 with 0 representing a totally failed reaction (0% yield) and 100 representing the ideal reaction which is defined as follows: Compound **A** (substrate) undergoes a reaction with (or in the presence of) inexpensive compound(s) **B** to give the desired compound **C** in 100% yield at room temperature with a minimal risk for the operator and a minimal impact on the environment. Six general parameters which influence the quality of reaction conditions are analyzed. Within each of these parameters, individual penalty points of various relative weights are assigned that take into account all possible situations when setting up an organic chemistry experiment. The penalty points are cumulative for all components of the preparation. In order to simplify the EcoScale design, the usual differentiation between solvents, reagents, auxiliary or co-reagents and catalysts is not made.

Ecoscale can be summarized by this simple equation:  $EcoScale = 100 - \text{sum of individual penalties}$ ."[4]

Ranking of reaction conditions is defined as follow: On a scale from 0 to 100 using the following scores: > 75 is **excellent**; > 50 is **acceptable** and < 50 is **inadequate**.

Below, Ecoscale score tables using magnetic stirrer or ball-mill are displayed, using the web version <http://ecoscale.cheminfo.org/calculator> of this green metric. Quantities used were obtained from the protocols reported above. As suggested on the web-calculator, penalties due to hazard should be limited to a maximum score of 20. Thus, even if this penalty number was found higher on the calculator, we corrected it to 20 (corrections in red in the following pictures).

**Table S2.** Summary of Ecoscale score calculations for the synthesis of **PZ-1361**

|             | ECOSCALE SCORE               |                                       |                  |               |
|-------------|------------------------------|---------------------------------------|------------------|---------------|
|             | Step 1                       | Step 2                                | Step 3           | Step 4        |
|             | Alkylation of 2-Phenylphenol | Alkylation of 4-Boc-N-aminopiperidine | Boc deprotection | Sulfonylation |
| Solution    | 44                           | 58                                    | 70               | 49            |
| Solid-state | 71                           | 71                                    | 81               | 78            |

## Alkylation of 2-phenylphenol in solution

| Reagents                                 |                                                                                                    |         |                                                                                                       |         |          |                    |          |          |          |  |  |  |
|------------------------------------------|----------------------------------------------------------------------------------------------------|---------|-------------------------------------------------------------------------------------------------------|---------|----------|--------------------|----------|----------|----------|--|--|--|
| <input checked="" type="checkbox"/> Link |                                                                                                    |         |                                                                                                       |         |          |                    |          |          |          |  |  |  |
| Identifier*                              | name                                                                                               | MF*     | MW                                                                                                    | density | purity*  | ml                 | g        | mmoles   | equiv.   |  |  |  |
| 1                                        | 2-Phenylphenol                                                                                     | C12H10O | 170.2108                                                                                              | 1.21    | 100%     | 0.825733           | 0.999137 | 5.87     | 1        |  |  |  |
| 2                                        | Potassium carbonate                                                                                | CK2O3   | 138.2058                                                                                              |         | 100%     | 0                  | 2.02817  | 14.675   | 2.5      |  |  |  |
| 3                                        | Potassium hydroxide                                                                                | HKO     | 56.10564                                                                                              |         | 100%     | 0                  | 0.16467  | 2.935    | 0.5      |  |  |  |
| 4                                        | Epichlorohydrin                                                                                    | C3H5ClO | 92.5251                                                                                               | 1.18    | 100%     | 0.920547           | 1.086245 | 11.74    | 2        |  |  |  |
| 5                                        | Acetone                                                                                            | C3H6O   | 58.08004                                                                                              | 0.79    | 100%     | 20                 | 15.8     | 272.0383 | 46.34384 |  |  |  |
| Products                                 |                                                                                                    |         |                                                                                                       |         |          |                    |          |          |          |  |  |  |
| Identifier*:                             | name:                                                                                              | MF*:    | MW:                                                                                                   | g:      | mmoles:  | g theor:           | yield:   |          |          |  |  |  |
|                                          | alkylated 2-phenylphenol                                                                           |         | 226.28                                                                                                | 0.82    | 3.623828 | 1.328264           | 61.7347  |          |          |  |  |  |
| Conditions                               |                                                                                                    |         |                                                                                                       |         |          |                    |          |          |          |  |  |  |
| Reagents                                 | Name                                                                                               | mmoles  | eq.                                                                                                   | Bp      | Hazard   | Price              |          |          |          |  |  |  |
|                                          | 2-Phenylphenol                                                                                     | 7.15    | 1                                                                                                     | 282     |          |                    |          |          |          |  |  |  |
|                                          | Potassium carbonate                                                                                | 17.89   | 2.5                                                                                                   |         |          |                    |          |          |          |  |  |  |
|                                          | Potassium hydroxide                                                                                | 3.57    | 0.5                                                                                                   |         |          |                    |          |          |          |  |  |  |
|                                          | Epichlorohydrin                                                                                    | 14.31   | 2                                                                                                     | 115     |          |                    |          |          |          |  |  |  |
|                                          | Acetone                                                                                            | 331.75  | 46.34                                                                                                 | 56      |          |                    |          |          |          |  |  |  |
| Yield                                    | 62                                                                                                 |         |                                                                                                       |         |          |                    | -19      |          |          |  |  |  |
| Price / availability                     |                                                                                                    |         |                                                                                                       |         |          | 0                  |          |          |          |  |  |  |
| Safety                                   |                                                                                                    |         |                                                                                                       |         |          | <del>-20</del> -20 |          |          |          |  |  |  |
| Technical setup                          | Possible items<br>Any additional special glassware (Inert) gas atmosphere<br>Glove box             |         | Selected items<br>Instruments for controlled addition of chemicals                                    |         |          | -1                 |          |          |          |  |  |  |
| Temperature / time                       | Possible items<br>Room temperature, < 1h<br>Room temperature, < 24h<br>Heating, < 1h               |         | Selected items<br>Heating, > 1h                                                                       |         |          | -3                 |          |          |          |  |  |  |
| Workup and purification                  | Possible items<br>Sublimation<br>Liquid - liquid extraction or washing<br>Classical chromatography |         | Selected items<br>Adding solvent<br>Liquid - liquid extraction or washing<br>Classical chromatography |         |          | -13                |          |          |          |  |  |  |
| EcoScale                                 |                                                                                                    |         |                                                                                                       |         |          | <del>20</del> 44   |          |          |          |  |  |  |

## Alkylation of 2-phenylphenol in ball-mill

| Reagents                                 |                                                                                                                                                                                                            |         |          |                                                                           |                                                                                   |                                                                                    |          |           |           |                                                                                                                                                                                                                                                             |
|------------------------------------------|------------------------------------------------------------------------------------------------------------------------------------------------------------------------------------------------------------|---------|----------|---------------------------------------------------------------------------|-----------------------------------------------------------------------------------|------------------------------------------------------------------------------------|----------|-----------|-----------|-------------------------------------------------------------------------------------------------------------------------------------------------------------------------------------------------------------------------------------------------------------|
| <input checked="" type="checkbox"/> Link |                                                                                                                                                                                                            |         |          |                                                                           |                                                                                   |                                                                                    |          |           |           |                                                                                                                                                                                                                                                             |
| identifier*                              | name                                                                                                                                                                                                       | MF*     | MW       | density                                                                   | purity*                                                                           | ml                                                                                 | g        | mmoles    | equiv.    |                                                                                                                                                                                                                                                             |
| 1                                        | 2-Phenylphenol                                                                                                                                                                                             | C12H10O | 170.2108 | 1.21                                                                      | 100%                                                                              | 0.066678                                                                           | 0.08068  | 0.474     | 1         |                                                                                       |
| 2                                        | Potassium carbonate                                                                                                                                                                                        | CK2O3   | 138.2058 |                                                                           | 100%                                                                              | 0                                                                                  | 0.196529 | 1.422     | 3         |                                                                                       |
| 3                                        | Epichlorohydrin                                                                                                                                                                                            | C3H5ClO | 92.5251  | 1.18                                                                      | 100%                                                                              | 0.0446                                                                             | 0.052628 | 0.5688    | 1.2       |                                                                                                                                                                          |
| 4                                        | Isopropanol                                                                                                                                                                                                | C3H8O   | 60.09592 | 0.785                                                                     | 100%                                                                              | 0.05                                                                               | 0.03925  | 0.6531225 | 1.3778956 |    |
| Products                                 |                                                                                                                                                                                                            |         |          |                                                                           |                                                                                   |                                                                                    |          |           |           |                                                                                                                                                                                                                                                             |
| identifier*                              | name                                                                                                                                                                                                       | MF*     | MW       | g                                                                         | mmoles                                                                            | g theor                                                                            | yield    |           |           |                                                                                                                                                                                                                                                             |
|                                          | alkylated 2-phenylphenol                                                                                                                                                                                   |         | 226.28   | 0.091                                                                     | 0.4021566                                                                         | 0.107257                                                                           | 84.8429  |           |           |                                                                                                                                                                                                                                                             |
| Conditions                               |                                                                                                                                                                                                            |         |          |                                                                           |                                                                                   |                                                                                    |          |           |           |                                                                                                                                                                                                                                                             |
| Reagents                                 | Name                                                                                                                                                                                                       | mmoles  | eq.      | Bp                                                                        | Hazard                                                                            | Price                                                                              |          |           |           |                                                                                                                                                                                                                                                             |
|                                          | 2-Phenylphenol                                                                                                                                                                                             | 5.2     | 1        | 282                                                                       |  |  |          |           |           |                                                                                                                                                                                                                                                             |
|                                          | Potassium carbonate                                                                                                                                                                                        | 15.62   | 3        |                                                                           |                                                                                   |  |          |           |           |                                                                                                                                                                                                                                                             |
|                                          | Epichlorohydrin                                                                                                                                                                                            | 6.25    | 1.2      | 115                                                                       |  |  |          |           |           |                                                                                                                                                                                                                                                             |
|                                          | Isopropanol                                                                                                                                                                                                | 7.17    | 1.37     | 81                                                                        |  |  |          |           |           |                                                                                                                                                                                                                                                             |
| Yield                                    | 85                                                                                                                                                                                                         |         |          |                                                                           |                                                                                   |                                                                                    | -8       |           |           |                                                                                                                                                                                                                                                             |
| Price / availability                     |                                                                                                                                                                                                            |         |          |                                                                           |                                                                                   |                                                                                    | 0        |           |           |                                                                                                                                                                                                                                                             |
| Safety                                   |                                                                                                                                                                                                            |         |          |                                                                           |                                                                                   |                                                                                    | -15      |           |           |                                                                                                                                                                                                                                                             |
| Technical setup                          | Possible items<br><small>instruments for controlled addition of chemicals</small><br>Unconventional activation technique<br>Pressure equipment, > 1 atm<br><small>Any additional special glassware</small> |         |          | Selected items<br>Unconventional activation technique                     |                                                                                   |                                                                                    | -2       |           |           |                                                                                                                                                                                                                                                             |
| Temperature / time                       | Possible items<br>Room temperature, < 1h<br>Room temperature, < 24h<br>Heating, < 1h                                                                                                                       |         |          | Selected items<br>Room temperature, < 24h                                 |                                                                                   |                                                                                    | -1       |           |           |                                                                                                                                                                                                                                                             |
| Workup and purification                  | Possible items<br>Cooling to room temperature<br>Adding solvent<br>Simple filtration                                                                                                                       |         |          | Selected items<br>Liquid - liquid extraction or washing<br>Adding solvent |                                                                                   |                                                                                    | -3       |           |           |                                                                                                                                                                                                                                                             |
| EcoScale                                 |                                                                                                                                                                                                            |         |          |                                                                           |                                                                                   |                                                                                    | 71       |           |           |                                                                                                                                                                                                                                                             |

## Alkylation of 4-Boc-N-aminopiperidine in solution

| Reagents                                 |                                                                                                                                                                                           |                          |           |                                                                                                                                                                                       |         |           |                                  |                                  |           |           |
|------------------------------------------|-------------------------------------------------------------------------------------------------------------------------------------------------------------------------------------------|--------------------------|-----------|---------------------------------------------------------------------------------------------------------------------------------------------------------------------------------------|---------|-----------|----------------------------------|----------------------------------|-----------|-----------|
| <input checked="" type="checkbox"/> Link |                                                                                                                                                                                           |                          |           |                                                                                                                                                                                       |         |           |                                  |                                  |           |           |
|                                          | identifier*                                                                                                                                                                               | name                     | MF*       | MW                                                                                                                                                                                    | density | purity*   | ml                               | g                                | mmoles    | equiv.    |
| 1                                        | <input type="text"/>                                                                                                                                                                      | alkylated 2-phenylphenol |           | 226.28                                                                                                                                                                                |         | 100%      | 0                                | 0.801031                         | 3.540000  | 1         |
| 2                                        | <input type="text"/>                                                                                                                                                                      | 4-N-Boc-Aminopiperidine  | C10H20N2O | 200.281                                                                                                                                                                               |         | 100%      | 0                                | 0.850794                         | 4.248     | 1.2       |
| 3                                        | <input type="text"/>                                                                                                                                                                      | Ethanol                  | C2H6O     | 46.06904                                                                                                                                                                              | 0.79    | 100%      | 15                               | 11.85                            | 257.22263 | 72.661762 |
| Products                                 |                                                                                                                                                                                           |                          |           |                                                                                                                                                                                       |         |           |                                  |                                  |           |           |
|                                          | identifier*:                                                                                                                                                                              | name:                    | MF*:      | MW:                                                                                                                                                                                   | g:      | mmoles:   | g theor:                         | yield:                           |           |           |
|                                          | <input type="text"/>                                                                                                                                                                      | amination product 3      |           | 426.56                                                                                                                                                                                | 1.17    | 2.7428732 | 1.510022                         | 77.482300                        |           |           |
| Conditions                               |                                                                                                                                                                                           |                          |           |                                                                                                                                                                                       |         |           |                                  |                                  |           |           |
| Reagents                                 | Name                                                                                                                                                                                      | mmoles                   | eq.       | Bp                                                                                                                                                                                    | Hazard  | Price     |                                  |                                  |           |           |
|                                          | alkylated 2-phenylphenol                                                                                                                                                                  | 3.02                     | 1         |                                                                                                                                                                                       |         |           |                                  |                                  |           |           |
|                                          | 4-N-Boc-Aminopiperidine                                                                                                                                                                   | 3.63                     | 1.2       |                                                                                                                                                                                       |         |           |                                  |                                  |           |           |
|                                          | Ethanol                                                                                                                                                                                   | 219.84                   | 72.66     |                                                                                                                                                                                       |         |           |                                  |                                  |           |           |
| Yield                                    | <input type="text" value="77"/>                                                                                                                                                           |                          |           |                                                                                                                                                                                       |         |           |                                  | <input type="text" value="-11"/> |           |           |
| Price / availability                     |                                                                                                                                                                                           |                          |           |                                                                                                                                                                                       |         |           |                                  | <input type="text" value="-8"/>  |           |           |
| Safety                                   |                                                                                                                                                                                           |                          |           |                                                                                                                                                                                       |         |           |                                  | <input type="text" value="-10"/> |           |           |
| Technical setup                          | Possible items<br><input type="text" value="Any additional special glassware (Inert) gas atmosphere Glove box"/>                                                                          |                          |           | Selected items<br><input type="text" value="Common set-up"/>                                                                                                                          |         |           | <input type="text" value="0"/>   |                                  |           |           |
| Temperature / time                       | Possible items<br><input type="text" value="Heating, &gt; 1h"/><br><input type="text" value="Cooling to 0°C"/><br><input type="text" value="Cooling, &lt; 0°C"/>                          |                          |           | Selected items<br><input type="text" value="Heating, &gt; 1h"/>                                                                                                                       |         |           | <input type="text" value="-3"/>  |                                  |           |           |
| Workup and purification                  | Possible items<br><input type="text" value="Sublimation"/><br><input type="text" value="Liquid - liquid extraction or washing"/><br><input type="text" value="Classical chromatography"/> |                          |           | Selected items<br><input type="text" value="Classical chromatography"/><br><input type="text" value="Simple filtration"/><br><input type="text" value="Cooling to room temperature"/> |         |           | <input type="text" value="-10"/> |                                  |           |           |
| EcoScale                                 |                                                                                                                                                                                           |                          |           |                                                                                                                                                                                       |         |           |                                  | <input type="text" value="58"/>  |           |           |

## Alkylation of 4-Boc-N-aminopiperidine in ball-mill

| Reagents                                 |                                                                                                          |        |              |                             |                                       |          |         |          |          |          |          |           |  |
|------------------------------------------|----------------------------------------------------------------------------------------------------------|--------|--------------|-----------------------------|---------------------------------------|----------|---------|----------|----------|----------|----------|-----------|--|
| <input checked="" type="checkbox"/> Link |                                                                                                          |        |              |                             |                                       |          |         |          |          |          |          |           |  |
| 1                                        | 2                                                                                                        | 3      | identifier*  | name                        | MF*                                   | MW       | density | purity*  | ml       | g        | mmoles   | equiv.    |  |
|                                          |                                                                                                          |        | Name, MF or  | alkylated 2-phenylphenol 1a |                                       | 226.28   |         | 100%     | 0        | 0.175141 | 0.774    | 1         |  |
|                                          |                                                                                                          |        |              | 4-N-Boc-Aminopiperidine     | C10H20N2O                             | 200.281  |         | 100%     | 0        | 0.155017 | 0.774    | 1         |  |
|                                          |                                                                                                          |        |              | Ethanol                     | C2H6O                                 | 46.06904 | 0.79    | 100%     | 0.033    | 0.02607  | 0.565889 | 0.7311237 |  |
| Products                                 |                                                                                                          |        |              |                             |                                       |          |         |          |          |          |          |           |  |
|                                          |                                                                                                          |        | identifier*: | name:                       | MF*:                                  | MW:      | g:      | mmoles:  | g theor: | yield:   |          |           |  |
|                                          |                                                                                                          |        |              | amination product 3a        |                                       | 426.56   | 0.297   | 0.696267 | 0.330157 | 89.9572  |          |           |  |
| Conditions                               |                                                                                                          |        |              |                             |                                       |          |         |          |          |          |          |           |  |
| Reagents                                 | Name                                                                                                     | mmoles | eq.          | Bp                          | Hazard                                | Price    |         |          |          |          |          |           |  |
|                                          | alkylated 2-phenylphenol 1a                                                                              | 2.6    | 1            |                             |                                       |          |         |          |          |          |          |           |  |
|                                          | 4-N-Boc-Aminopiperidine                                                                                  | 2.6    | 1            |                             |                                       |          |         |          |          |          |          |           |  |
|                                          | Ethanol                                                                                                  | 1.9    | 0.73         |                             |                                       |          |         |          |          |          |          |           |  |
| Yield                                    | 90                                                                                                       |        |              |                             |                                       |          |         |          |          | -5       |          |           |  |
| Price / availability                     |                                                                                                          |        |              |                             |                                       |          |         |          |          | -8       |          |           |  |
| Safety                                   |                                                                                                          |        |              |                             |                                       |          |         |          |          | -10      |          |           |  |
| Technical setup                          | Possible items                                                                                           |        |              |                             | Selected items                        |          |         |          |          |          |          |           |  |
|                                          | Common set-up<br>Instruments for controlled addition of chemicals<br>Unconventional activation technique |        |              |                             | Unconventional activation technique   |          |         |          | -2       |          |          |           |  |
| Temperature / time                       | Possible items                                                                                           |        |              |                             | Selected items                        |          |         |          |          |          |          |           |  |
|                                          | Room temperature, < 1h<br>Room temperature, < 24h<br>Heating, < 1h                                       |        |              |                             | Room temperature, < 24h               |          |         |          | -1       |          |          |           |  |
| Workup and purification                  | Possible items                                                                                           |        |              |                             | Selected items                        |          |         |          |          |          |          |           |  |
|                                          | Sublimation<br>Liquid - liquid extraction or washing<br>Classical chromatography                         |        |              |                             | Liquid - liquid extraction or washing |          |         |          | -3       |          |          |           |  |
| EcoScale                                 |                                                                                                          |        |              |                             |                                       |          |         |          |          |          | 71       |           |  |



## General procedure for deprotection of Boc function in solution

| Reagents                                       |                   |       |          |         |         |    |          |          |           |    |
|------------------------------------------------|-------------------|-------|----------|---------|---------|----|----------|----------|-----------|----|
| <input checked="" type="checkbox"/> Link       |                   |       |          |         |         |    |          |          |           |    |
| 1                                              | 2                 | 3     | 4        | 5       | 6       | 7  | 8        | 9        | 10        | 11 |
| identifier*                                    | name              | MF*   | MW       | density | purity* | ml | g        | mmoles   | equiv.    |    |
| <input type="text" value="Intermediate 3a"/>   | Intermediate 3a   |       | 426.56   |         | 100%    | 0  | 1.002416 | 2.35     | 1         |    |
| <input type="text" value="Hydrochloric acid"/> | Hydrochloric acid | HCl   | 36.46094 |         | 100%    | 0  | 0.873969 | 23.97    | 10.2      |    |
| <input type="text" value="Ethanol"/>           | Ethanol           | C2H6O | 46.06904 | 0.79    | 100%    | 47 | 37.13    | 805.9642 | 342.96351 |    |

  

| Products                                    |                |     |       |       |          |          |          |  |  |  |
|---------------------------------------------|----------------|-----|-------|-------|----------|----------|----------|--|--|--|
| identifier*                                 | name           | MF* | MW    | g     | mmoles   | g theor  | yield    |  |  |  |
| <input type="text" value="Intermediate 4"/> | Intermediate 4 |     | 362.9 | 0.832 | 2.292642 | 0.852815 | 97.55930 |  |  |  |

  

| Conditions                                       |        |        |                         |        |       |  |     |  |  |  |
|--------------------------------------------------|--------|--------|-------------------------|--------|-------|--|-----|--|--|--|
| Reagents                                         |        |        |                         |        |       |  |     |  |  |  |
| Name                                             | mmoles | eq.    | Bp                      | Hazard | Price |  |     |  |  |  |
| Intermediate 3a                                  | 2.82   | 1      |                         |        |       |  |     |  |  |  |
| Hydrochloric acid                                | 28.81  | 10.19  | 57                      |        |       |  |     |  |  |  |
| Ethanol                                          | 968.7  | 342.96 |                         |        |       |  |     |  |  |  |
| Yield                                            |        |        |                         |        |       |  |     |  |  |  |
| 98                                               |        |        |                         |        |       |  | -1  |  |  |  |
| Price / availability                             |        |        |                         |        |       |  |     |  |  |  |
|                                                  |        |        |                         |        |       |  | -8  |  |  |  |
| Safety                                           |        |        |                         |        |       |  |     |  |  |  |
|                                                  |        |        |                         |        |       |  | -20 |  |  |  |
| Technical setup                                  |        |        |                         |        |       |  |     |  |  |  |
| Possible items                                   |        |        | Selected items          |        |       |  |     |  |  |  |
| Common set-up                                    |        |        | Common set-up           |        |       |  |     |  |  |  |
| Instruments for controlled addition of chemicals |        |        |                         |        |       |  |     |  |  |  |
| Unconventional activation technique              |        |        |                         |        |       |  |     |  |  |  |
|                                                  |        |        |                         |        |       |  | 0   |  |  |  |
| Temperature / time                               |        |        |                         |        |       |  |     |  |  |  |
| Possible items                                   |        |        | Selected items          |        |       |  |     |  |  |  |
| Room temperature, < 1h                           |        |        | Room temperature, < 24h |        |       |  |     |  |  |  |
| Room temperature, < 24h                          |        |        |                         |        |       |  |     |  |  |  |
| Heating, < 1h                                    |        |        |                         |        |       |  |     |  |  |  |
|                                                  |        |        |                         |        |       |  | -1  |  |  |  |
| Workup and purification                          |        |        |                         |        |       |  |     |  |  |  |
| Possible items                                   |        |        | Selected items          |        |       |  |     |  |  |  |
| Adding solvent                                   |        |        | Simple filtration       |        |       |  |     |  |  |  |
| Simple filtration                                |        |        |                         |        |       |  |     |  |  |  |
| Removal of solvent with bp < 150°C               |        |        |                         |        |       |  |     |  |  |  |
| Crystallization and filtration                   |        |        |                         |        |       |  |     |  |  |  |
|                                                  |        |        |                         |        |       |  | 0   |  |  |  |
| EcoScale                                         |        |        |                         |        |       |  |     |  |  |  |
|                                                  |        |        |                         |        |       |  | 70  |  |  |  |

## General procedure for deprotection of Boc function in solid state

| Reagents                                 |                                                  |             |                   |                                     |           |          |         |    |          |           |        |
|------------------------------------------|--------------------------------------------------|-------------|-------------------|-------------------------------------|-----------|----------|---------|----|----------|-----------|--------|
| <input checked="" type="checkbox"/> Link |                                                  |             |                   |                                     |           |          |         |    |          |           |        |
| 1                                        | 2                                                | identifier* | name              | MF*                                 | MW        | density  | purity* | ml | g        | mmoles    | equiv. |
|                                          |                                                  | Name, MF or | Intermediate 3a   |                                     | 426.56    |          | 100%    | 0  | 0.49481  | 1.16      | 1      |
|                                          |                                                  |             | Hydrochloric acid | HCl                                 | 36.46094  |          | 100%    | 0  | 0.431406 | 11.831999 | 10.2   |
|                                          |                                                  |             |                   |                                     |           |          |         |    |          |           |        |
| Products                                 |                                                  |             |                   |                                     |           |          |         |    |          |           |        |
| identifier*:                             | name:                                            | MF*:        | MW:               | g:                                  | mmoles:   | g theor: | yield:  |    |          |           |        |
|                                          | Intermediate 4                                   |             | 362.9             | 0.412                               | 1.1352989 | 0.420964 | 97.8706 |    |          |           |        |
| Conditions                               |                                                  |             |                   |                                     |           |          |         |    |          |           |        |
| Reagents                                 | Name                                             | mmoles      | eq.               | Bp                                  | Hazard    | Price    |         |    |          |           |        |
|                                          | Intermediate 3a                                  | 2.81        | 1                 |                                     |           |          |         |    |          |           |        |
|                                          | Hydrochloric acid                                | 28.71       | 10.19             | 57                                  |           |          |         |    |          |           |        |
| Yield                                    | 98                                               |             |                   |                                     |           |          | -1      |    |          |           |        |
| Price / availability                     |                                                  |             |                   |                                     |           |          | -5      |    |          |           |        |
| Safety                                   |                                                  |             |                   |                                     |           |          | -10     |    |          |           |        |
| Technical setup                          | Possible items                                   |             |                   | Selected items                      |           |          |         |    |          |           |        |
|                                          | Common set-up                                    |             |                   | Unconventional activation technique |           |          | -2      |    |          |           |        |
|                                          | Instruments for controlled addition of chemicals |             |                   |                                     |           |          |         |    |          |           |        |
|                                          | Unconventional activation technique              |             |                   |                                     |           |          |         |    |          |           |        |
| Temperature / time                       | Possible items                                   |             |                   | Selected items                      |           |          |         |    |          |           |        |
|                                          | Room temperature, < 1h                           |             |                   | Room temperature, < 24h             |           |          | -1      |    |          |           |        |
|                                          | Room temperature, < 24h                          |             |                   |                                     |           |          |         |    |          |           |        |
|                                          | Heating, < 1h                                    |             |                   |                                     |           |          |         |    |          |           |        |
| Workup and purification                  | Possible items                                   |             |                   | Selected items                      |           |          |         |    |          |           |        |
|                                          | None                                             |             |                   | None                                |           |          | 0       |    |          |           |        |
|                                          | Cooling to room temperature                      |             |                   |                                     |           |          |         |    |          |           |        |
|                                          | Adding solvent                                   |             |                   |                                     |           |          |         |    |          |           |        |
| EcoScale                                 |                                                  |             |                   |                                     |           |          | 81      |    |          |           |        |

## Sulfonylation of primary amine in solution

| Reagents                                 |                                                                                                                            |            |           |                                                                                  |          |          |           |           |           |  |  |
|------------------------------------------|----------------------------------------------------------------------------------------------------------------------------|------------|-----------|----------------------------------------------------------------------------------|----------|----------|-----------|-----------|-----------|--|--|
| <input checked="" type="checkbox"/> Link |                                                                                                                            |            |           |                                                                                  |          |          |           |           |           |  |  |
| identifier*                              | name                                                                                                                       | MF*        | MW        | density                                                                          | purity*  | ml       | g         | mmoles    | equiv.    |  |  |
| 1                                        | Name, MF or<br>Amine 4                                                                                                     |            | 362.9     |                                                                                  | 100%     | 0        | 0.333868  | 0.92      | 1         |  |  |
| 2                                        | 3-Chlorobenzenesulfonyl chloride                                                                                           | C6H4Cl2O2S | 211.06256 |                                                                                  | 100%     | 0        | 0.233013  | 1.104     | 1.2       |  |  |
| 3                                        | Triethylamine                                                                                                              | C6H15N     | 101.1918  | 0.728                                                                            | 100%     | 0.383639 | 0.279289  | 2.760000  | 3         |  |  |
| 4                                        | Dichloromethane                                                                                                            | CH2Cl2     | 84.93288  | 1.325                                                                            | 100%     | 4        | 5.3       | 62.402216 | 67.828496 |  |  |
| Products                                 |                                                                                                                            |            |           |                                                                                  |          |          |           |           |           |  |  |
| identifier*:                             | name:                                                                                                                      | MF*:       | MW:       | g:                                                                               | mmoles:  | g theor: | yield:    |           |           |  |  |
|                                          | Final compound PZ-1361                                                                                                     |            | 501.04    | 0.33                                                                             | 0.658630 | 0.460957 | 71.590200 |           |           |  |  |
| Conditions                               |                                                                                                                            |            |           |                                                                                  |          |          |           |           |           |  |  |
| Reagents                                 | Name                                                                                                                       | mmoles     | eq.       | Bp                                                                               | Hazard   | Price    |           |           |           |  |  |
|                                          | Amine 4                                                                                                                    | 2.78       | 1         |                                                                                  |          |          |           |           |           |  |  |
|                                          | 3-Chlorobenzenesulfonyl chloride                                                                                           | 3.34       | 1.2       | 102                                                                              |          |          |           |           |           |  |  |
|                                          | Triethylamine                                                                                                              | 8.36       | 3         | 90                                                                               |          |          |           |           |           |  |  |
|                                          | Dichloromethane                                                                                                            | 189.09     | 67.82     | 39                                                                               |          |          |           |           |           |  |  |
| Yield                                    | 72                                                                                                                         |            |           |                                                                                  |          |          | -14       |           |           |  |  |
| Price / availability                     |                                                                                                                            |            |           |                                                                                  |          |          | -13       |           |           |  |  |
| Safety                                   |                                                                                                                            |            |           |                                                                                  |          |          | -10       |           |           |  |  |
| Technical setup                          | Possible items<br>Common set-up<br>Instruments for controlled addition of chemicals<br>Unconventional activation technique |            |           | Selected items<br>Common set-up                                                  |          |          | 0         |           |           |  |  |
| Temperature / time                       | Possible items<br>Heating, > 1h<br>Cooling to 0°C<br>Cooling, < 0°C                                                        |            |           | Selected items<br>Cooling to 0°C                                                 |          |          | -4        |           |           |  |  |
| Workup and purification                  | Possible items<br>Sublimation<br>Liquid - liquid extraction or washing<br>Classical chromatography                         |            |           | Selected items<br>Removal of solvent with bp < 150°C<br>Classical chromatography |          |          | -10       |           |           |  |  |
| EcoScale                                 |                                                                                                                            |            |           |                                                                                  |          |          | 49        |           |           |  |  |

## Sulfonylation of primary amine in ball-mill

| Reagents                                 |                                                                                                                            |            |           |                                                         |          |          |          |        |        |  |  |
|------------------------------------------|----------------------------------------------------------------------------------------------------------------------------|------------|-----------|---------------------------------------------------------|----------|----------|----------|--------|--------|--|--|
| <input checked="" type="checkbox"/> Link |                                                                                                                            |            |           |                                                         |          |          |          |        |        |  |  |
| identifier*                              | name                                                                                                                       | MF*        | MW        | density                                                 | purity*  | ml       | g        | mmoles | equiv. |  |  |
| 1                                        | Name, MF or Amine 4                                                                                                        |            | 362.9     |                                                         | 100%     | 0        | 0.168023 | 0.463  | 1      |  |  |
| 2                                        | 3-Chlorobenzenesulfonyl chloride                                                                                           | C6H4Cl2O2S | 211.06256 |                                                         | 100%     | 0        | 0.097722 | 0.463  | 1      |  |  |
| 3                                        | Potassium carbonate                                                                                                        | CK2O3      | 138.2058  |                                                         | 100%     | 0        | 0.063989 | 0.463  | 1      |  |  |
| Products                                 |                                                                                                                            |            |           |                                                         |          |          |          |        |        |  |  |
| identifier*                              | name:                                                                                                                      | MF*        | MW:       | g:                                                      | mmoles:  | g theor: | yield:   |        |        |  |  |
|                                          | Final compound PZ-1361                                                                                                     |            | 501.04    | 0.2001                                                  | 0.399369 | 0.231982 | 86.2567  |        |        |  |  |
| Conditions                               |                                                                                                                            |            |           |                                                         |          |          |          |        |        |  |  |
| Reagents                                 | Name                                                                                                                       | mmoles     | eq.       | Bp                                                      | Hazard   | Price    |          |        |        |  |  |
|                                          | Amine 4                                                                                                                    | 2.31       | 1         |                                                         |          |          |          |        |        |  |  |
|                                          | 3-Chlorobenzenesulfonyl chloride                                                                                           | 2.31       | 1         | 102                                                     |          |          |          |        |        |  |  |
|                                          | Potassium carbonate                                                                                                        | 2.31       | 1         |                                                         |          |          |          |        |        |  |  |
| Yield                                    | 86                                                                                                                         |            |           |                                                         |          |          | -7       |        |        |  |  |
| Price / availability                     |                                                                                                                            |            |           |                                                         |          |          | -10      |        |        |  |  |
| Safety                                   |                                                                                                                            |            |           |                                                         |          |          | 0        |        |        |  |  |
| Technical setup                          | Possible items<br>Common set-up<br>Instruments for controlled addition of chemicals<br>Unconventional activation technique |            |           | Selected items<br>Unconventional activation technique   |          |          | -2       |        |        |  |  |
| Temperature / time                       | Possible items<br>Room temperature, < 1h<br>Room temperature, < 24h<br>Heating, < 1h                                       |            |           | Selected items<br>Room temperature, < 1h                |          |          | 0        |        |        |  |  |
| Workup and purification                  | Possible items<br>Sublimation<br>Liquid - liquid extraction or washing<br>Classical chromatography                         |            |           | Selected items<br>Liquid - liquid extraction or washing |          |          | -3       |        |        |  |  |
| EcoScale                                 |                                                                                                                            |            |           |                                                         |          |          | 78       |        |        |  |  |

## II. Additional experimental data for alkylation of 2-phenylphenol in ball-mill

**Table S3.** Optimization of the kind of base for the alkylation of 2-phenylphenol<sup>a</sup>

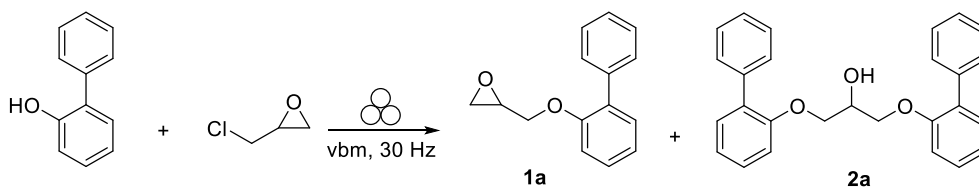

| Entry | Base (eq)                                   | Conv. % <sup>b</sup> |    |
|-------|---------------------------------------------|----------------------|----|
|       |                                             | 1a                   | 2a |
| 1     | NaHCO <sub>3</sub> (3)                      | 2                    | 0  |
| 2     | Na <sub>2</sub> CO <sub>3</sub> (3)         | 1                    | 0  |
| 3     | K <sub>2</sub> CO <sub>3</sub> (3)          | 35                   | 0  |
| 4     | K <sub>2</sub> CO <sub>3</sub> /KOH (3/0.5) | 26                   | 0  |
| 5     | K <sub>2</sub> CO <sub>3</sub> /KOH (2/1.5) | 35                   | 3  |
| 6     | Cs <sub>2</sub> CO <sub>3</sub> (3)         | 29                   | 10 |
| 7     | NaOH (3)                                    | 16                   | 0  |
| 8     | KOH (3)                                     | 36                   | 10 |
| 9     | NaOtBut (3)                                 | 32                   | 3  |
| 10    | DIEA (3)                                    | 2                    | 0  |
| 11    | TEA (3)                                     | 5                    | 0  |

<sup>a</sup> Reaction conditions: 2-phenylphenol (1 eq), epichlorohydrin (1 eq), vbm 30 Hz, 10 mL PTFE jar,  $\omega = 1$  cm, 80 min, total mass of reagents: 100 mg; <sup>b</sup> Conversions were determined by UPLC/MS analysis.

**Table S4.** Optimization of milling time for the alkylation of 2-phenylphenol<sup>a</sup>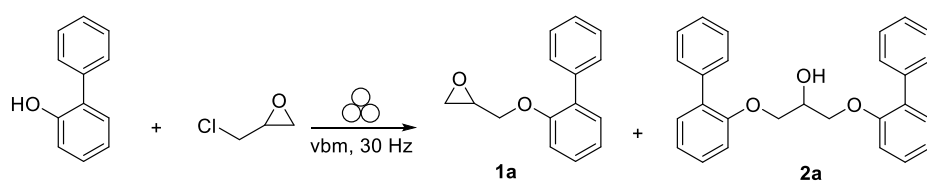

| Entry | Base (eq)        | Time (min) | Conv.% <sup>b</sup> |     |
|-------|------------------|------------|---------------------|-----|
|       |                  |            | 1a                  | 2a  |
| 1     |                  | 40         | 15                  | 0   |
| 2     |                  | 80         | 35                  | 0   |
| 3     |                  | 120        | 40                  | 0.5 |
| 4     | $K_2CO_3$<br>(3) | 140        | 43                  | 2   |
| 5     |                  | 160        | 45                  | 3.5 |
| 6     |                  | 180        | 47.5                | 5   |
| 7     |                  | 200        | 48.5                | 7.5 |
| 8     |                  | 210        | 50                  | 8.5 |
| 9     |                  | 220        | 52                  | 10  |

<sup>a</sup> Reaction conditions: 2-phenylphenol (1 eq), epichlorohydrin (1 eq), vbm 30 Hz, 10 mL PTFE jar,  $\infty = 1$  cm, total mass of reagents: 100 mg; <sup>b</sup> Conversions were determined by UPLC/MS analysis.

**Table S5.** Optimization of the milling conditions for the alkylation of 2-phenylphenol<sup>a</sup>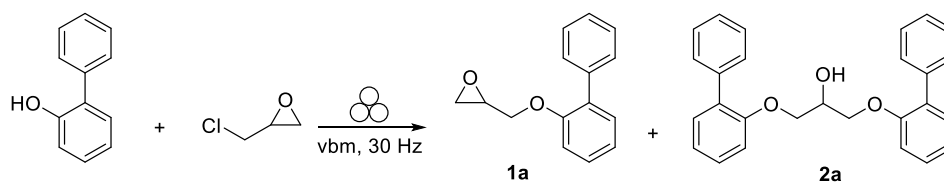

| Entry | Base (eq)                      | Epich. | s      | Time (min) | Conv. % <sup>b</sup> |     |
|-------|--------------------------------|--------|--------|------------|----------------------|-----|
|       |                                |        |        |            | 1a                   | 2a  |
| 1     |                                | 1 eq   | 1 cm   |            | 42.5                 | 2.5 |
| 2     | K <sub>2</sub> CO <sub>3</sub> | 1 eq   | 1.5 cm | 140        | 61                   | 2.5 |
| 3     | (3)                            | 1.2 eq | 1.5 cm |            | 90                   | 2   |
| 4     |                                | 1.5 eq | 1.5 cm |            | 86                   | 1   |

<sup>a</sup> Reaction conditions: 2-phenylphenol (1 eq), vbm 30 Hz, total mass of reagents: 100 mg; 10 mL PTFE jar;

<sup>b</sup> Conversions were determined by UPLC/MS analysis.

### III. HRMS, <sup>1</sup>H- and <sup>13</sup>C-NMR spectra

#### 2-([1,1'-Biphenyl]-2-yloxy)methyl)oxirane (**1a**)

##### HRMS

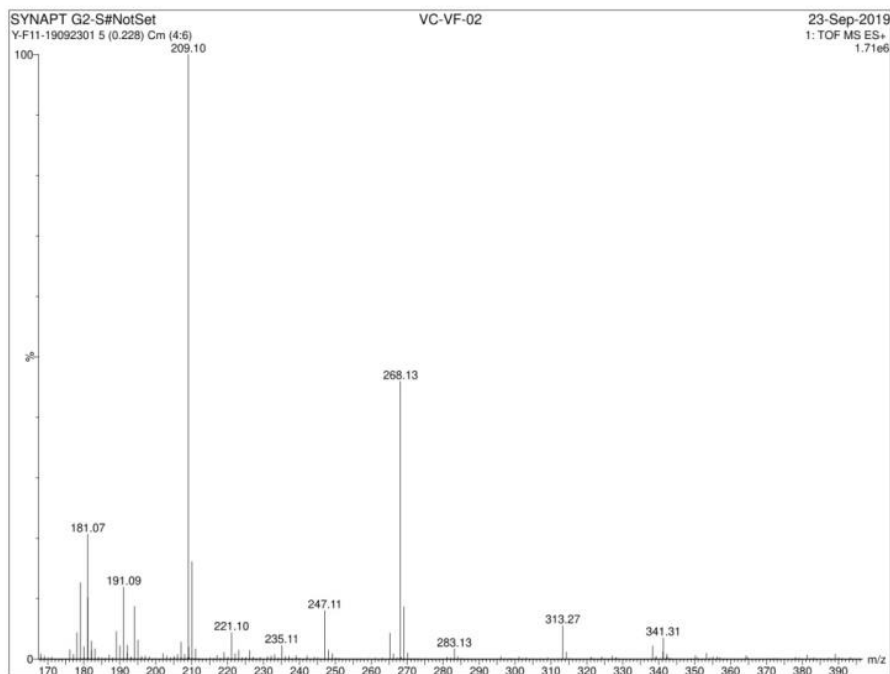

##### <sup>1</sup>H-NMR (CDCl<sub>3</sub>, 500 MHz)

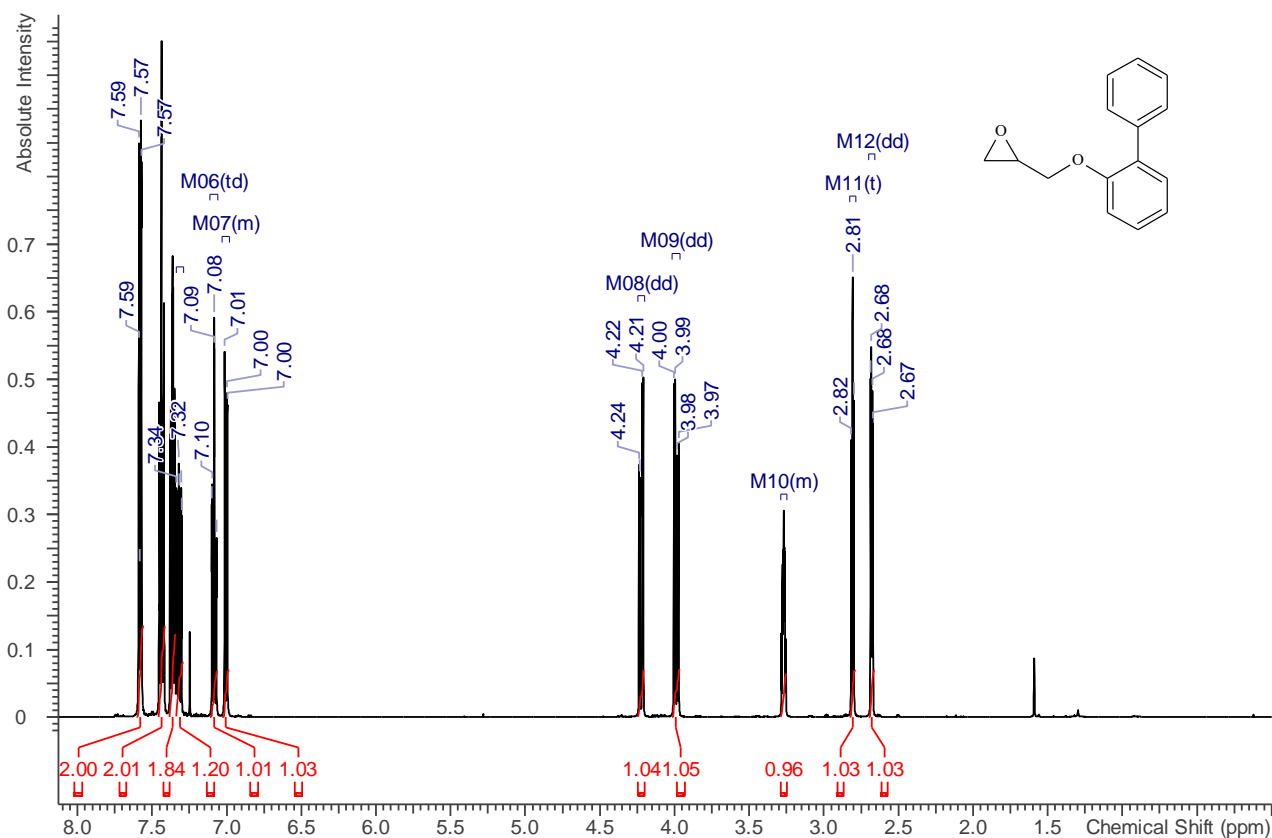



$^{13}\text{C}$ -NMR ( $\text{CDCl}_3$ , 126 MHz)

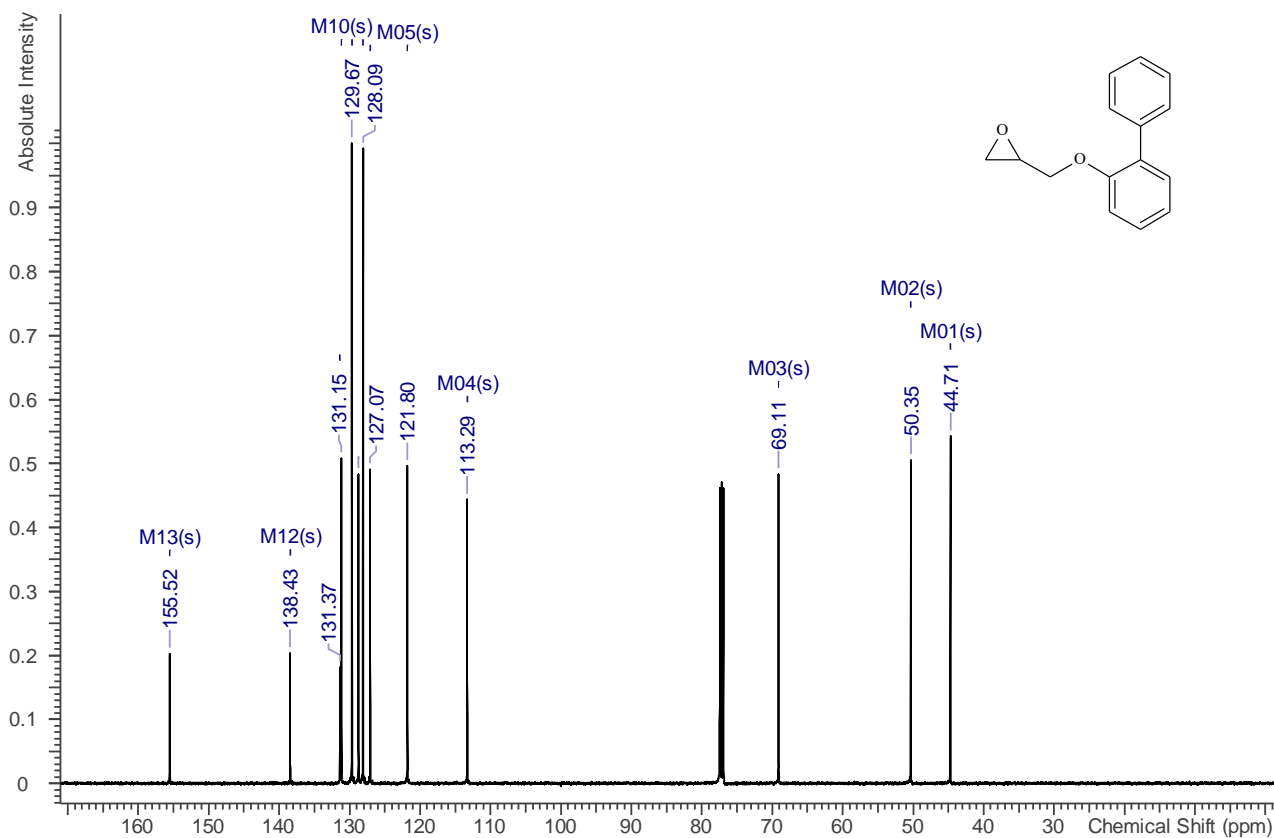

2-(Phenoxymethyl)oxirane (1b)

HRMS

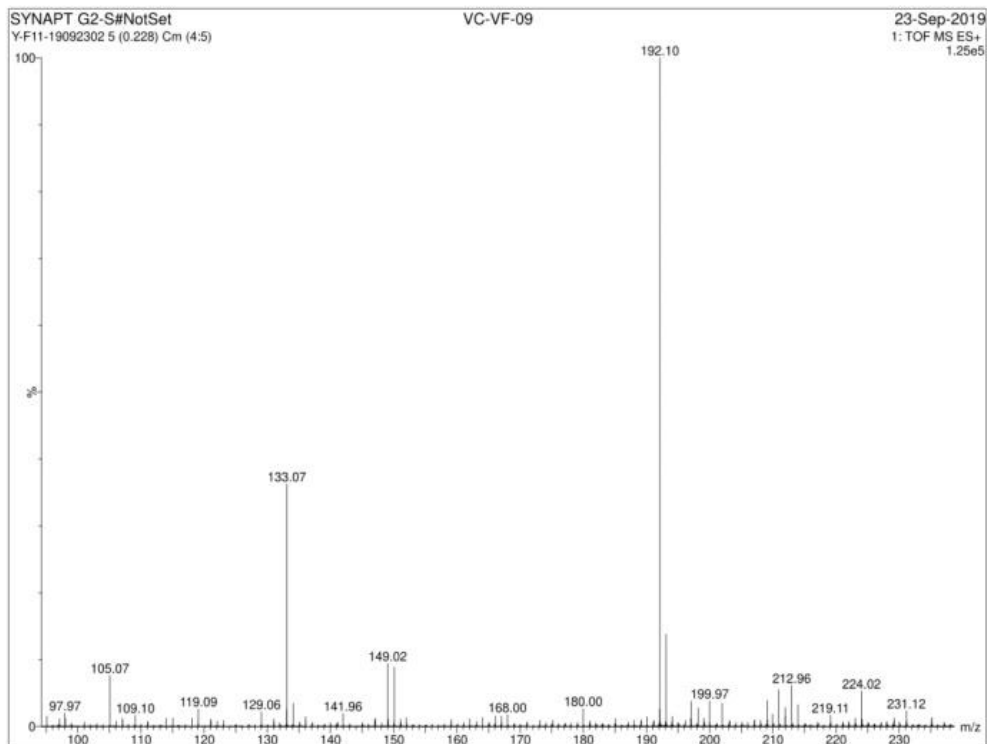

$^1\text{H-NMR}$  ( $\text{CDCl}_3$ , 500 MHz)

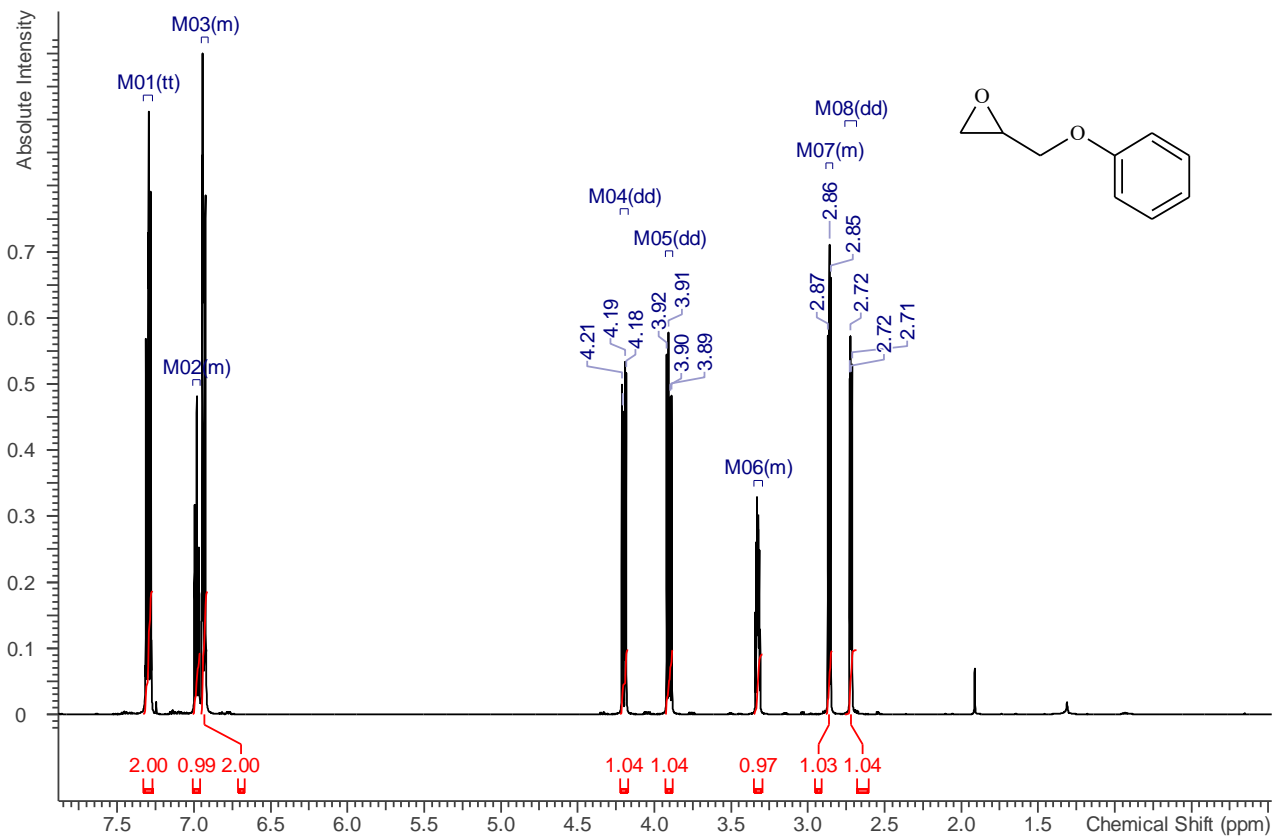

$^{13}\text{C-NMR}$  ( $\text{CDCl}_3$ , 126 MHz)

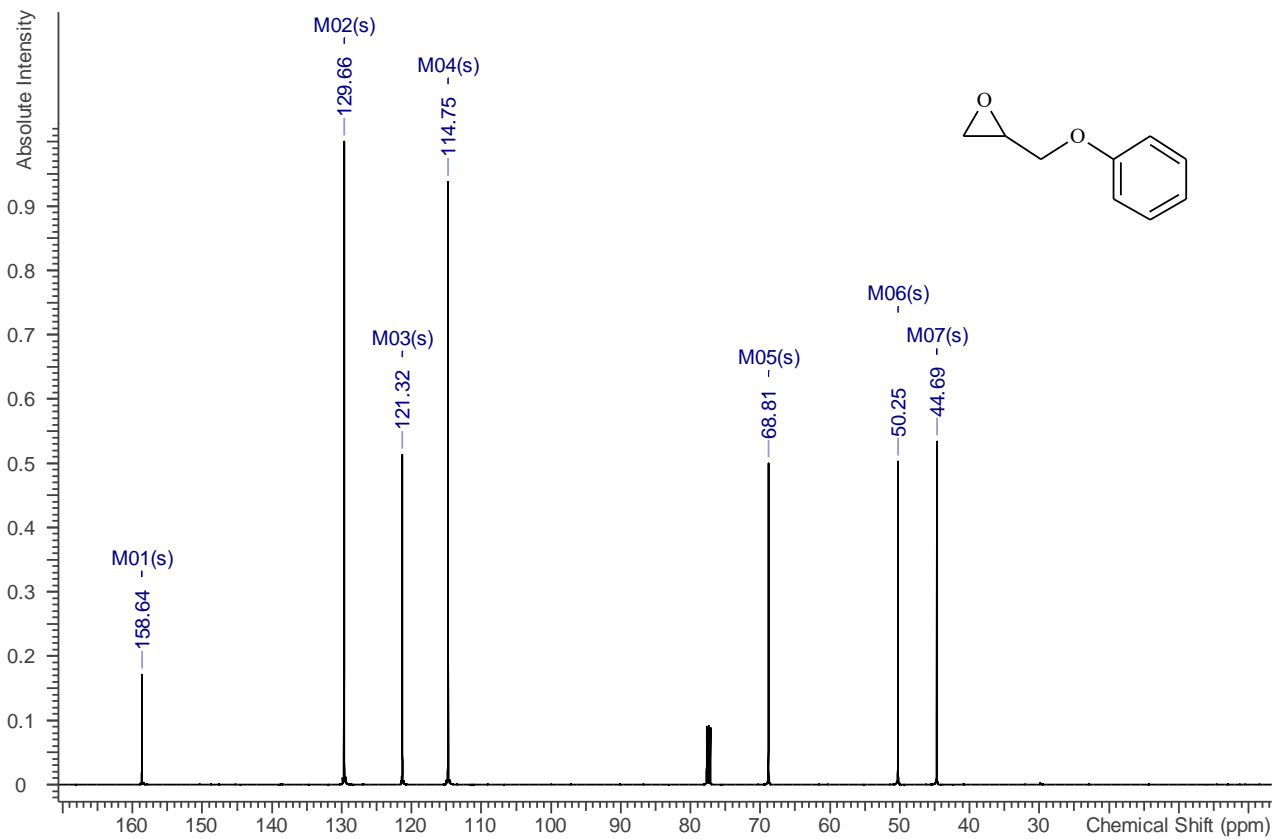

2-((2-Isopropylphenoxy)methyl)oxirane (**1c**)  
HRMS

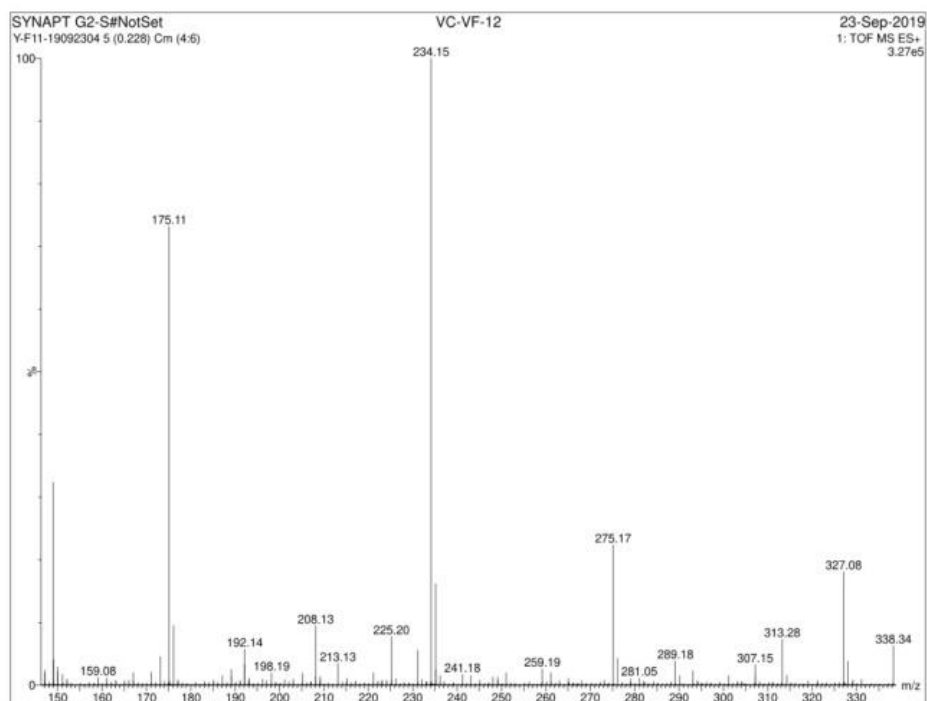

$^1\text{H-NMR}$  ( $\text{CDCl}_3$ , 500 MHz)

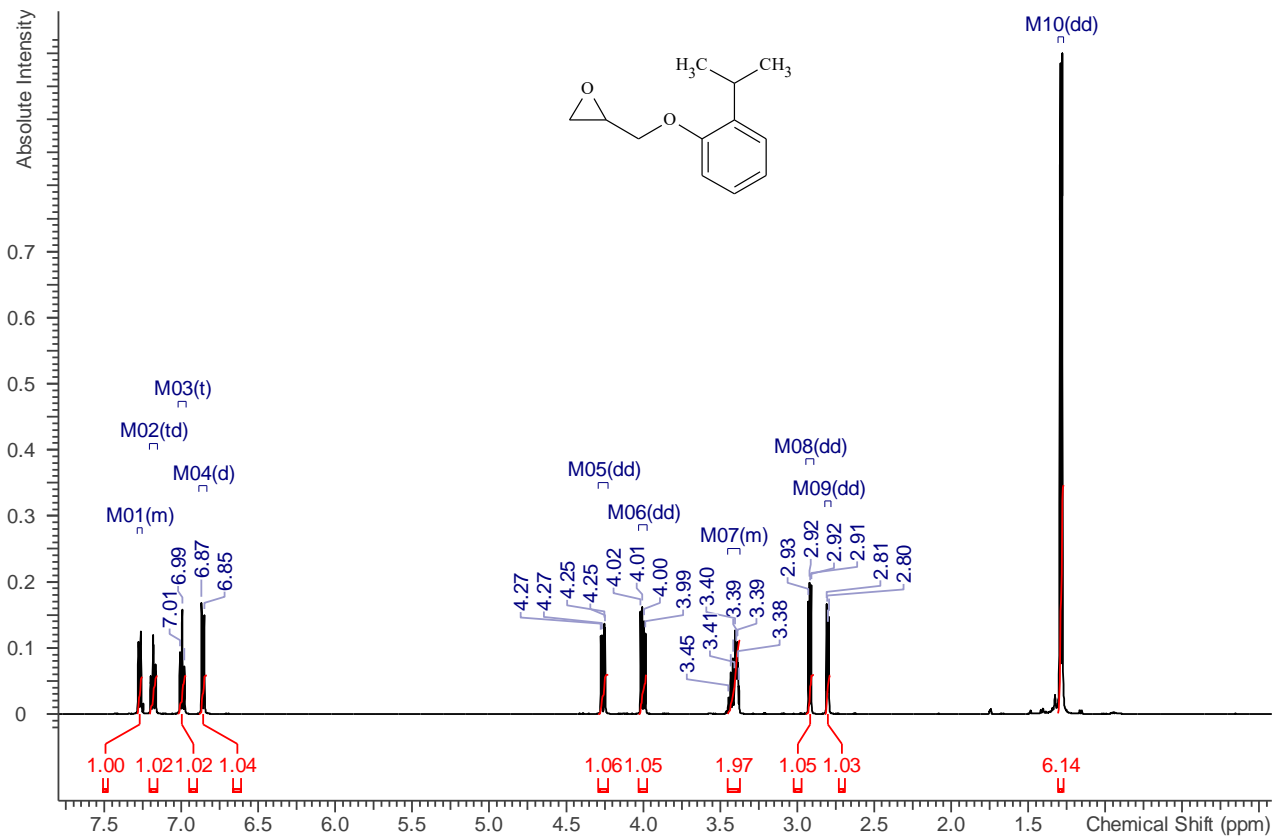

<sup>13</sup>C-NMR (CDCl<sub>3</sub>, 126 MHz)

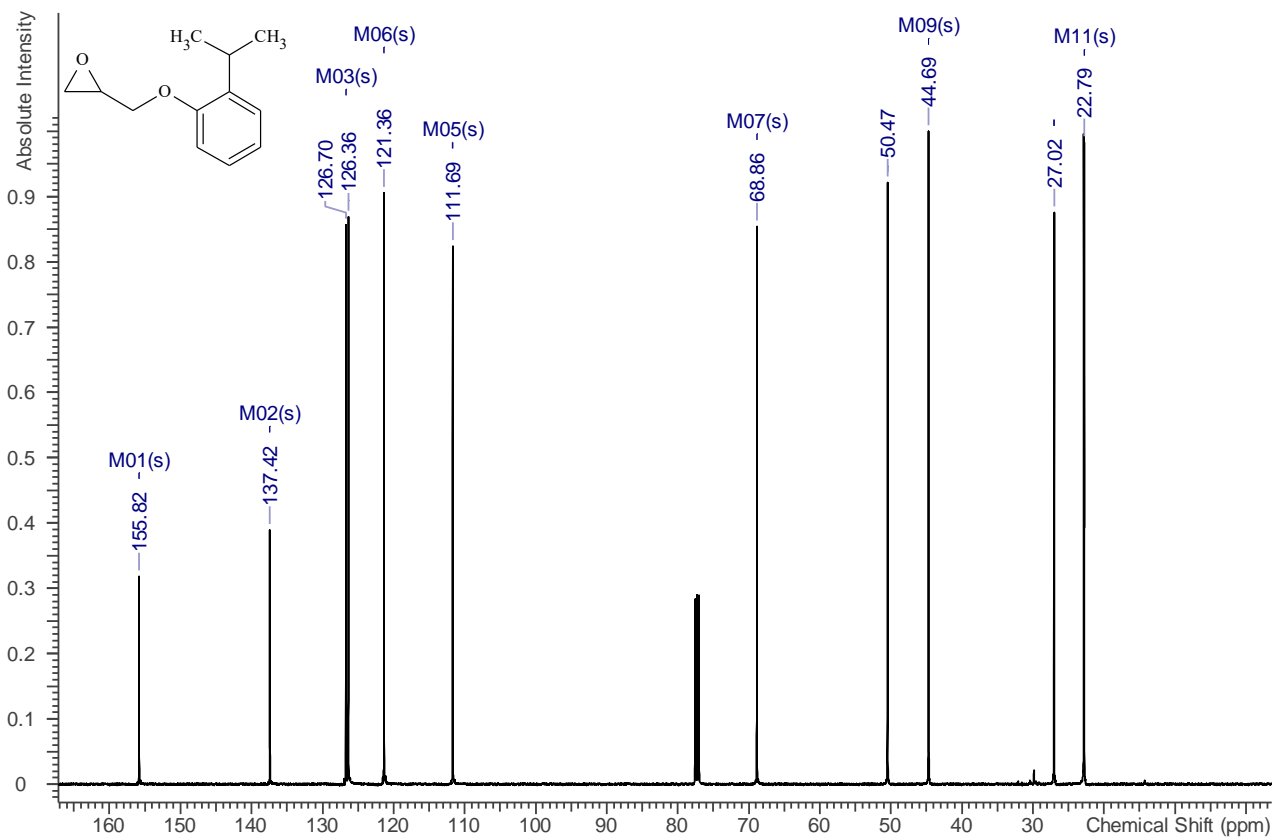

2-((2-Iodophenoxy)methyl)oxirane (**1d**)

HRMS

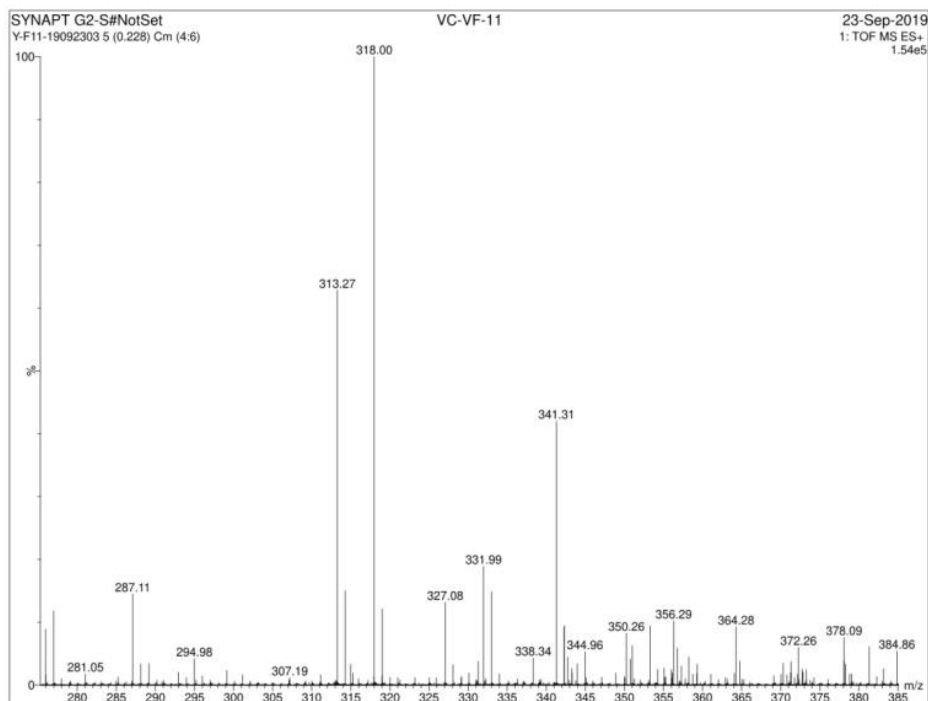

$^1\text{H-NMR}$  ( $\text{CDCl}_3$ , 500 MHz)

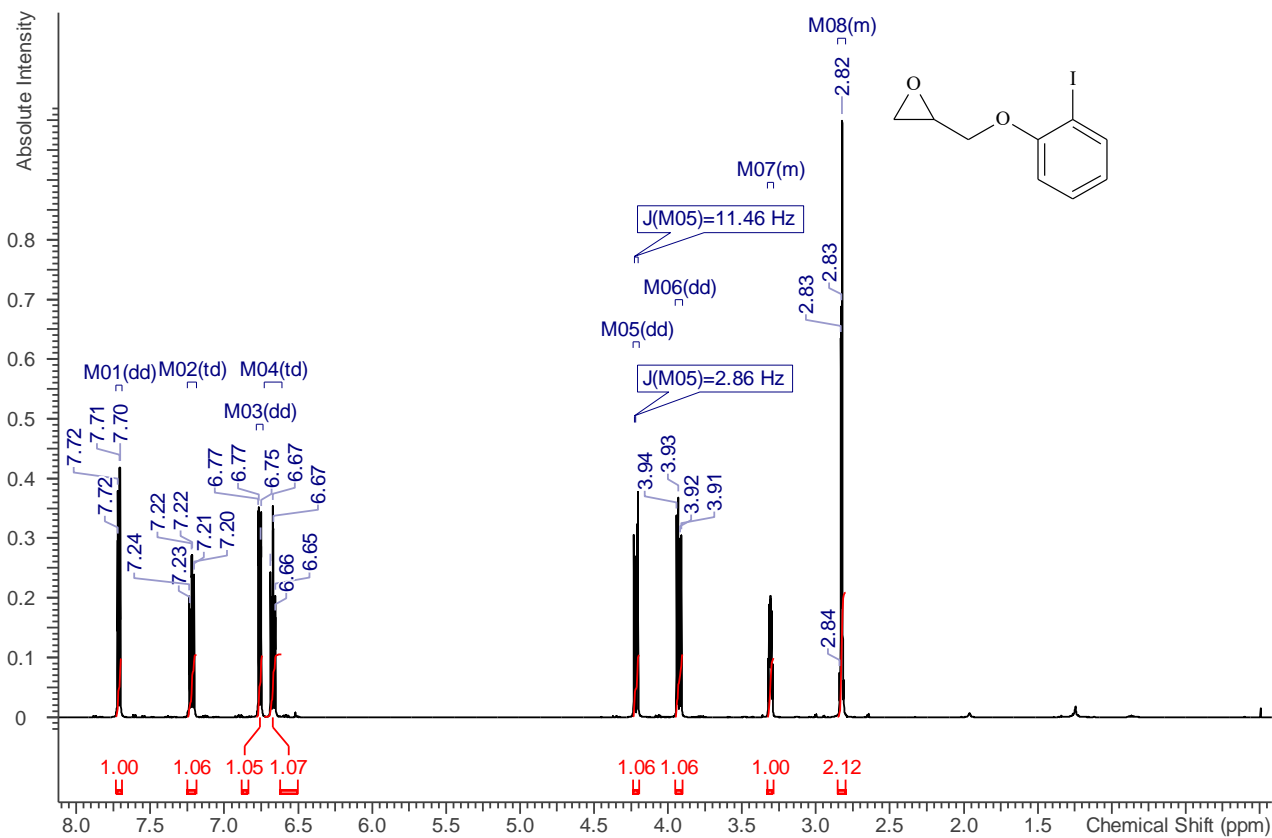

$^{13}\text{C}$ -NMR ( $\text{CDCl}_3$ , 126 MHz)

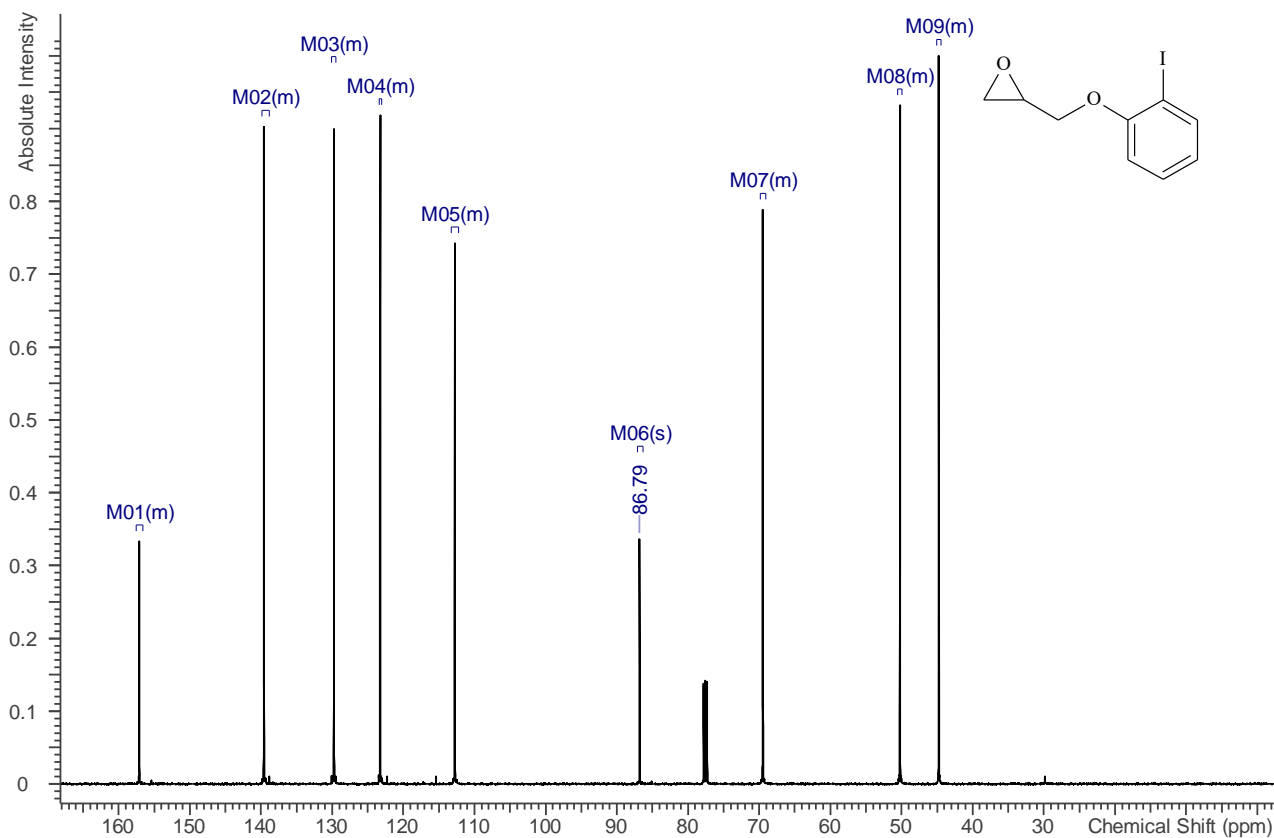

*Tert-butyl (1-(3-([1,1'-biphenyl]-2-yloxy)-2-hydroxypropyl)piperidin-4-yl)carbamate (3a)*  
HRMS

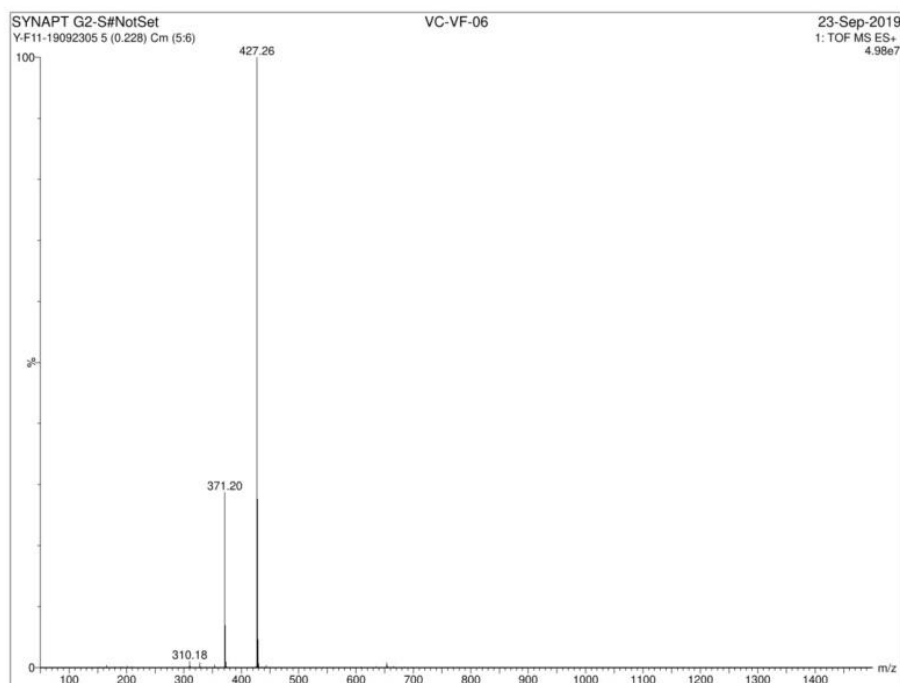

<sup>1</sup>H-NMR (CDCl<sub>3</sub>, 500 MHz)

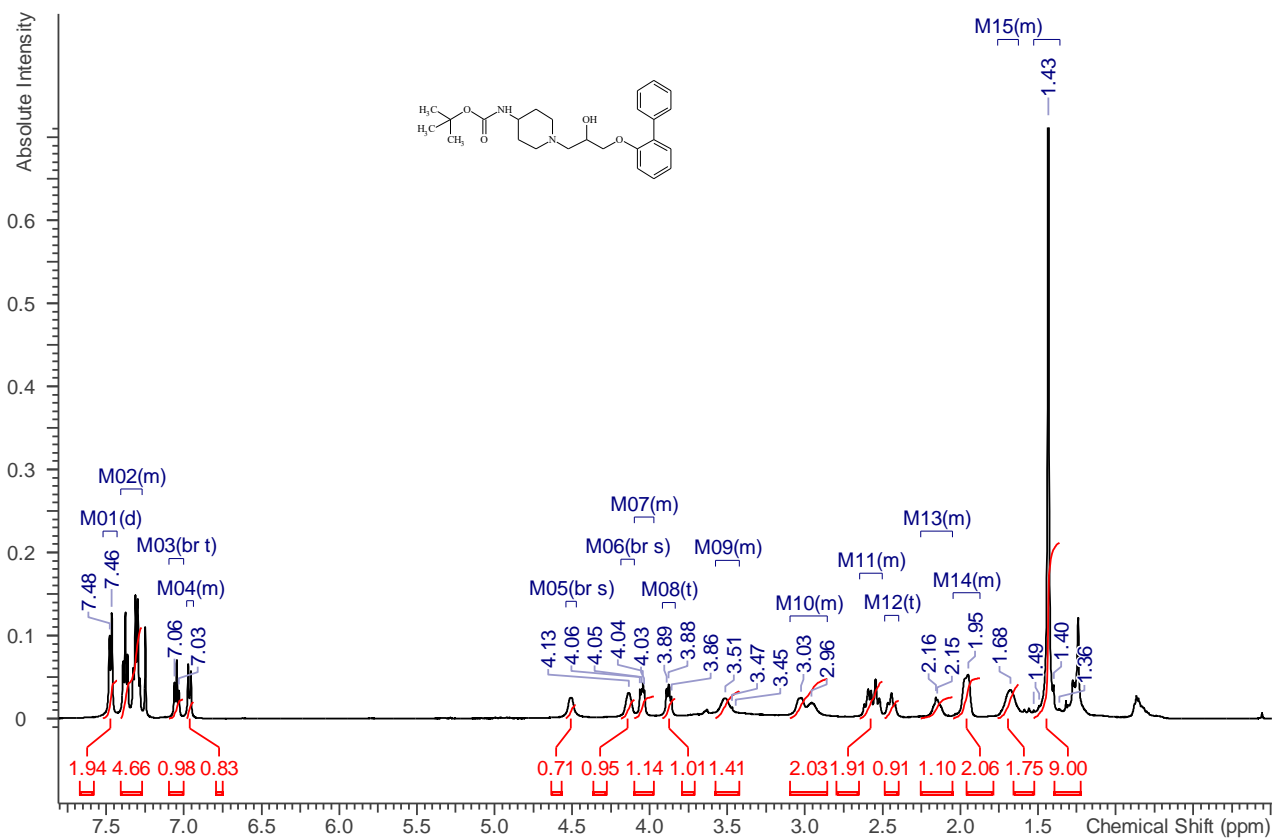

<sup>13</sup>C-NMR (CDCl<sub>3</sub>, 126 MHz)

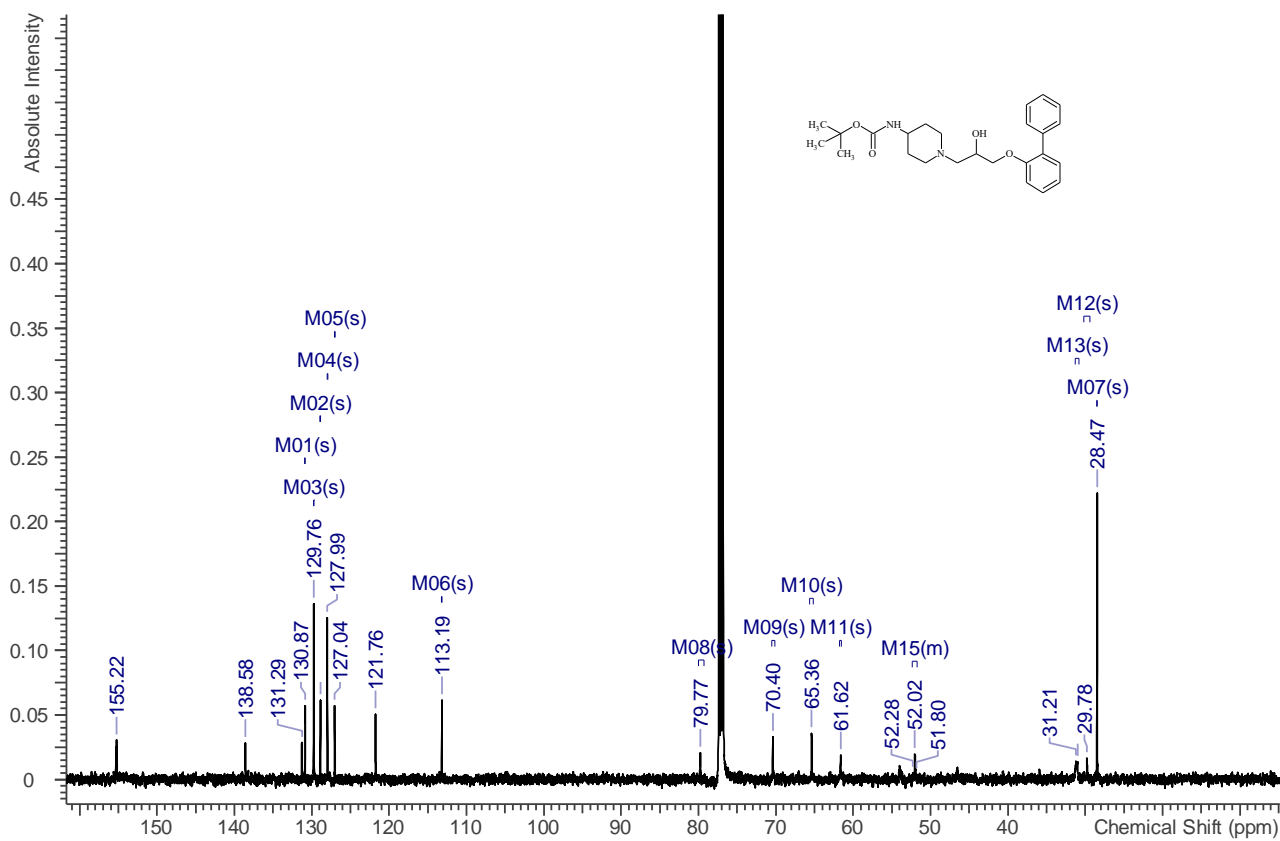

*Tert-butyl ((1R,5S)-8-(3-([1,1'-biphenyl]-2-yloxy)-2-hydroxypropyl)-8-azabicyclo[3.2.1]octan-3-yl)carbamate (3b)*  
 HRMS

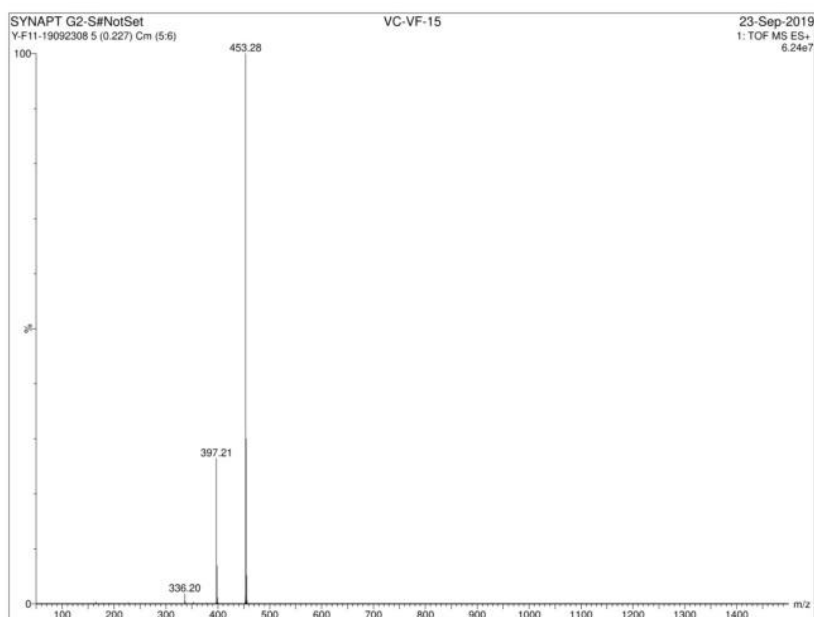

$^1\text{H-NMR}$  ( $\text{CDCl}_3$ , 500 MHz)

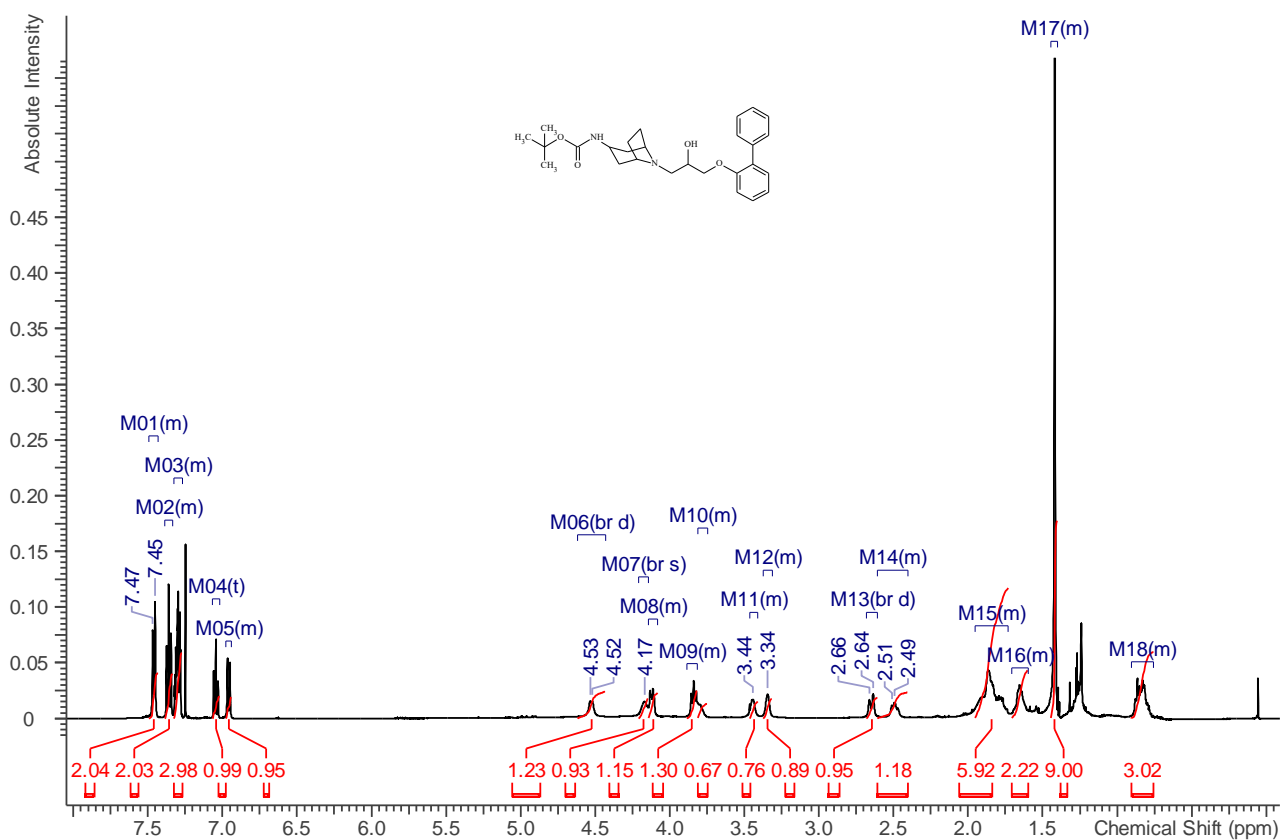



$^{13}\text{C}$ -NMR ( $\text{CDCl}_3$ , 126 MHz)

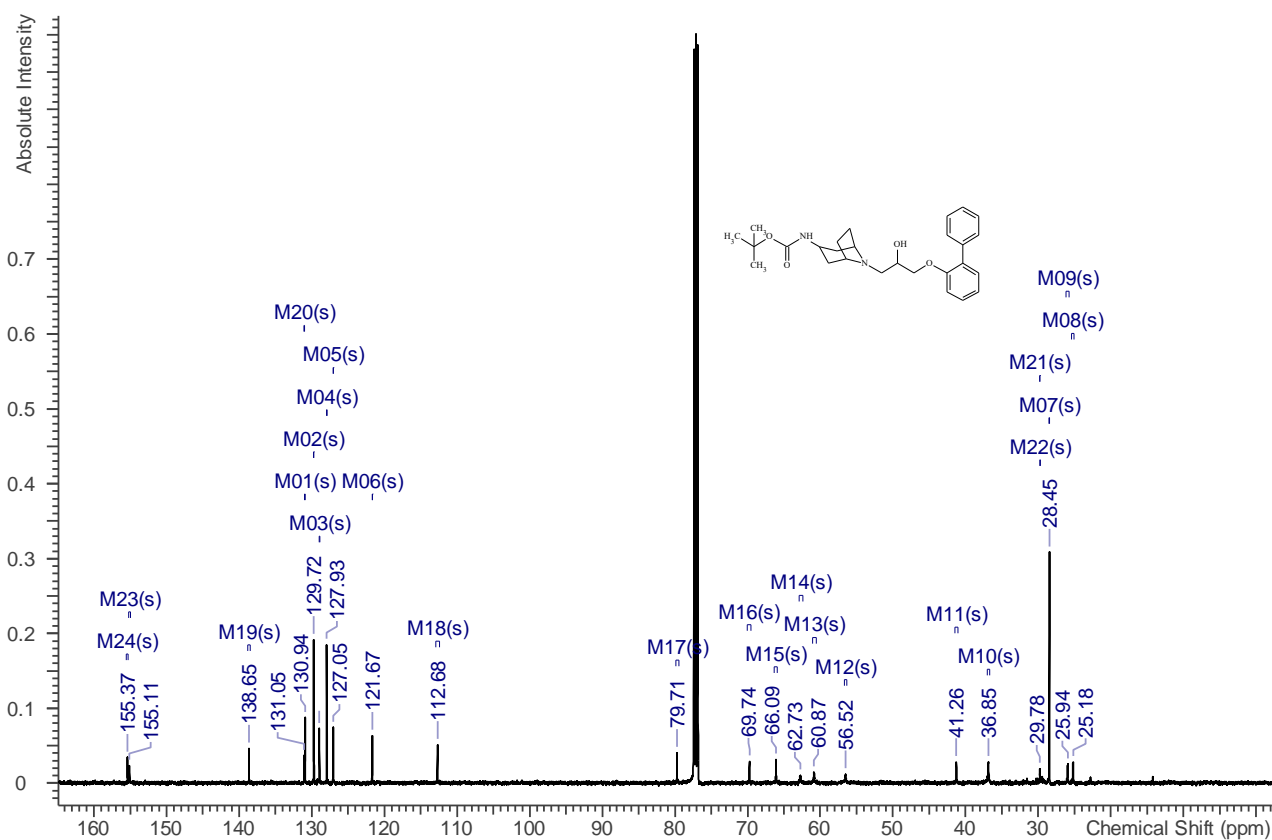

*Tert-butyl 4-(3-([1,1'-biphenyl]-2-yloxy)-2-hydroxypropyl)piperazine-1-carboxylate (3c)*

HRMS

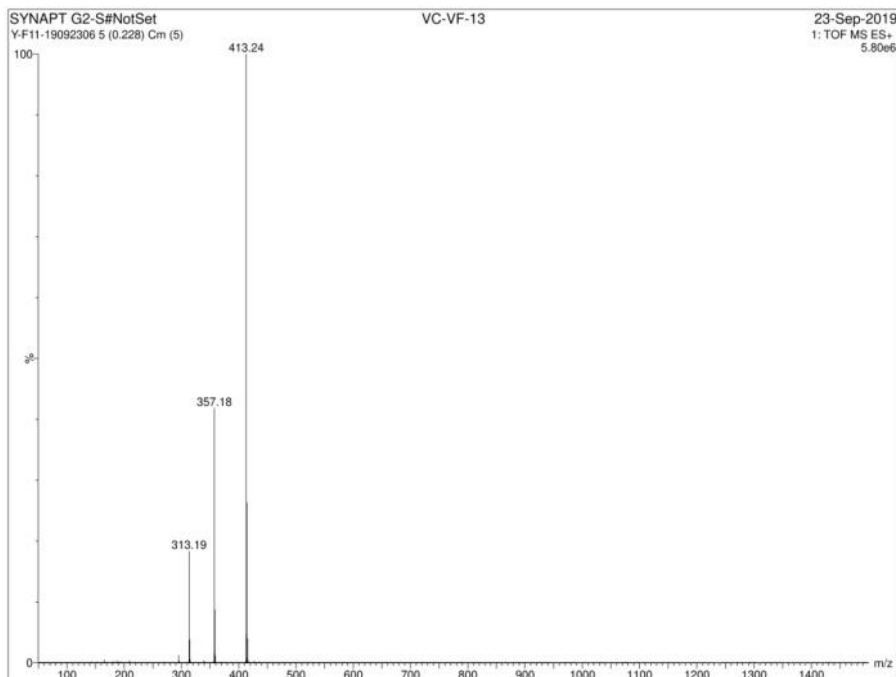

<sup>1</sup>H-NMR (CDCl<sub>3</sub>, 500 MHz)

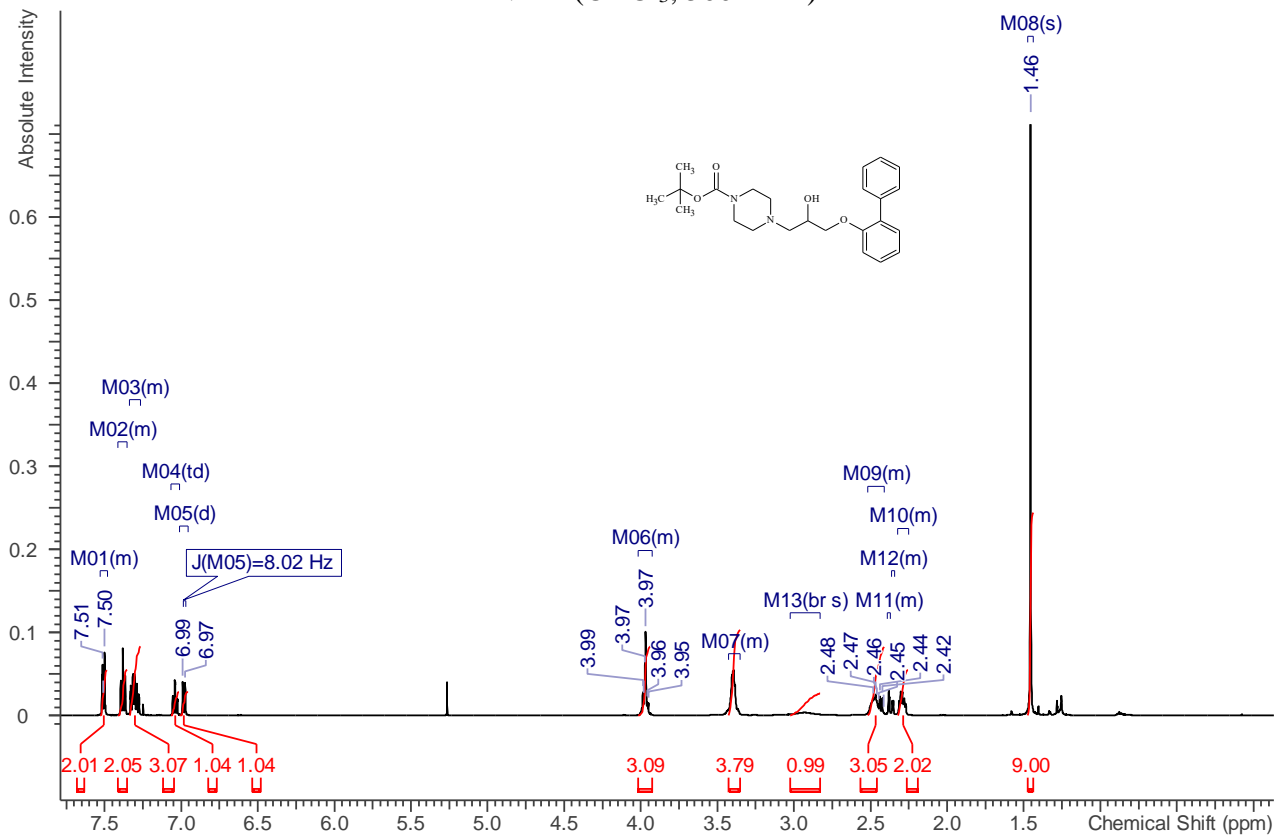

<sup>13</sup>C-NMR (CDCl<sub>3</sub>, 126 MHz)

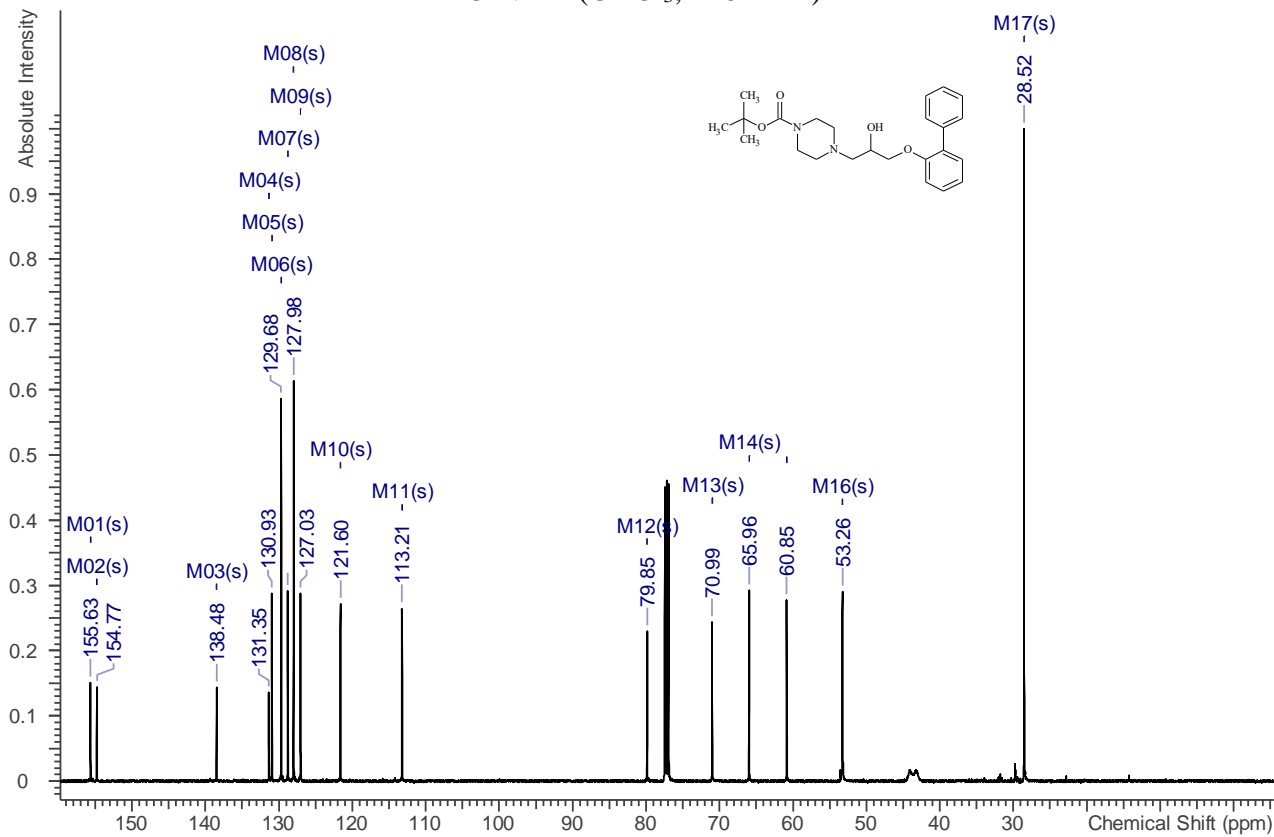

*Tert-butyl (1-(3-([1,1'-biphenyl]-2-yloxy)-2-hydroxypropyl)pyrrolidin-3-yl)carbamate (3d)*

HRMS

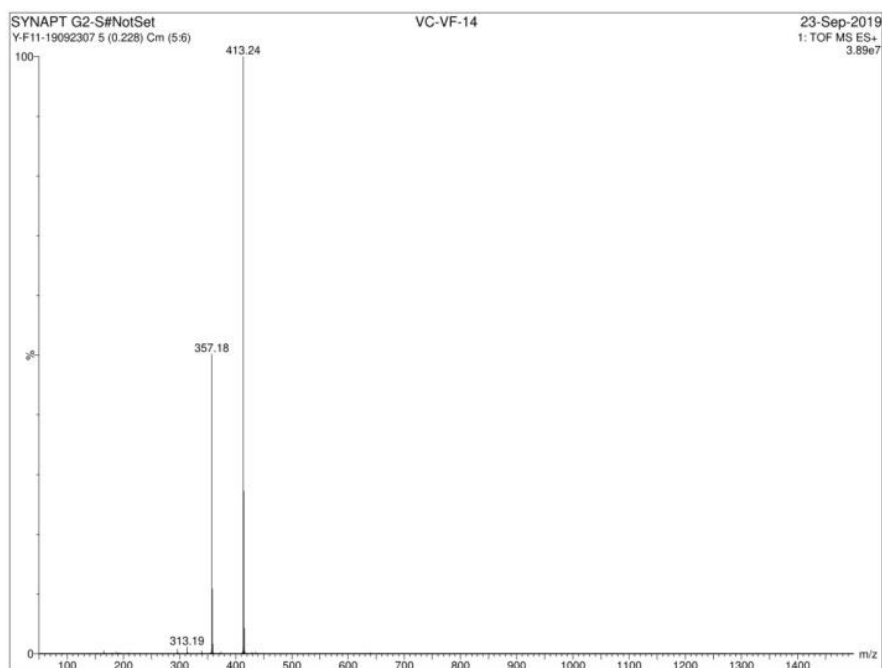

<sup>1</sup>H-NMR (CDCl<sub>3</sub>, 500 MHz)

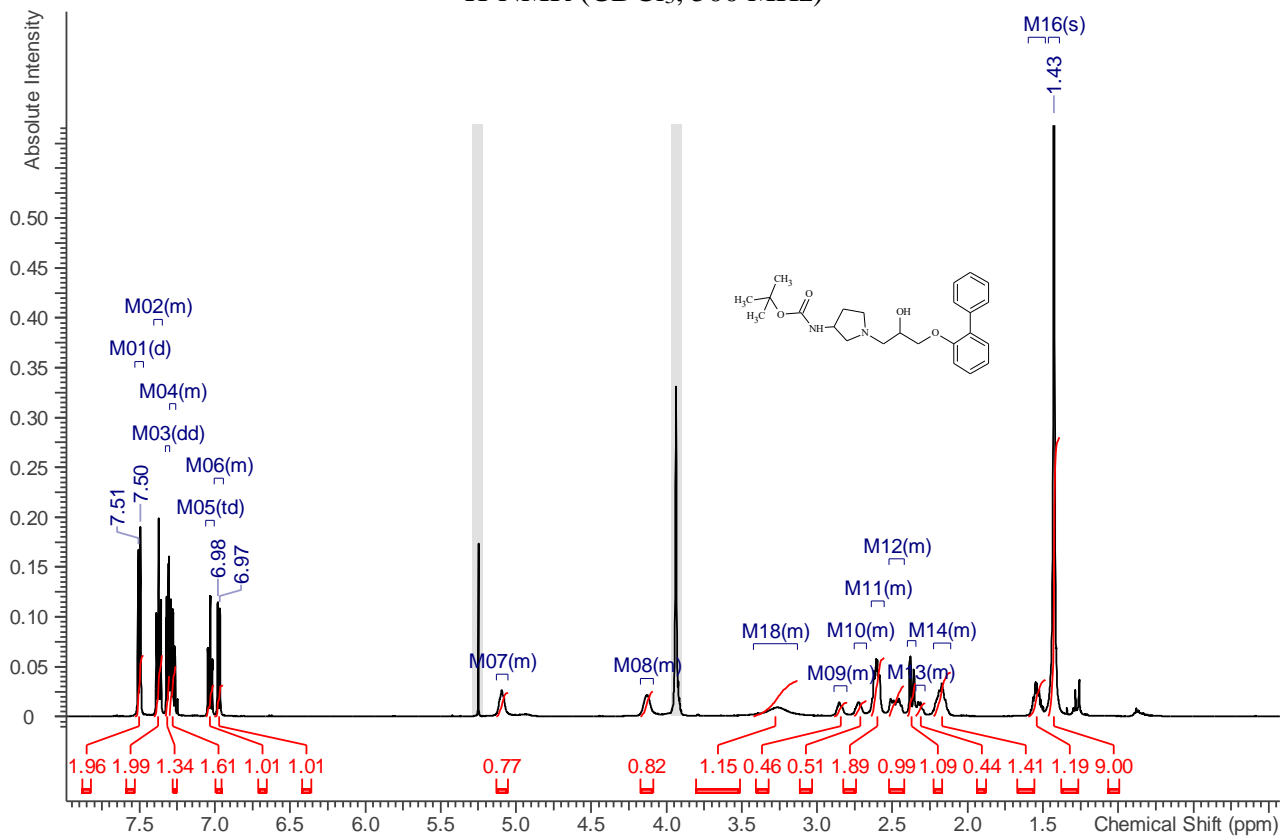

$^{13}\text{C}$ -NMR ( $\text{CDCl}_3$ , 126 MHz)

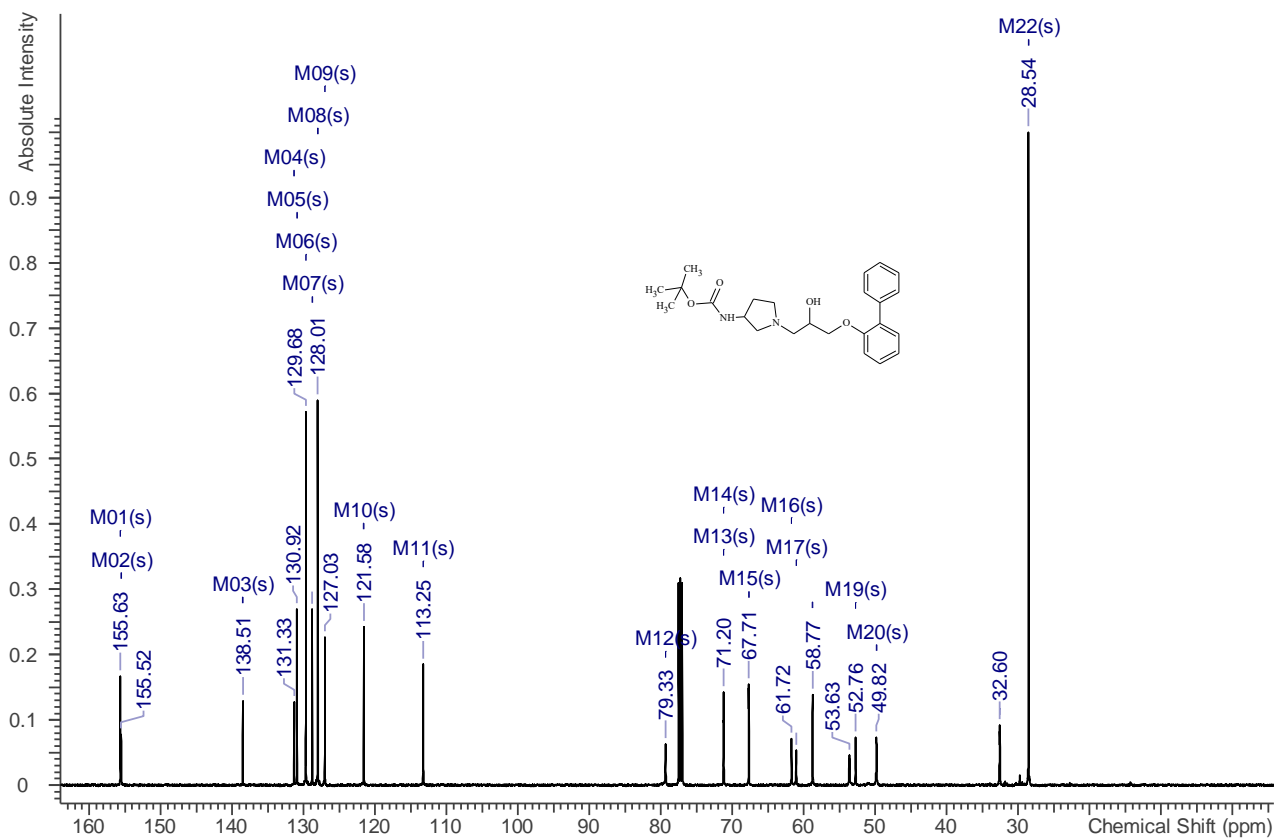

*1-([1,1'-Biphenyl]-2-yloxy)-3-(4-aminopiperidin-1-yl)propan-2-ol (4)*

HRMS

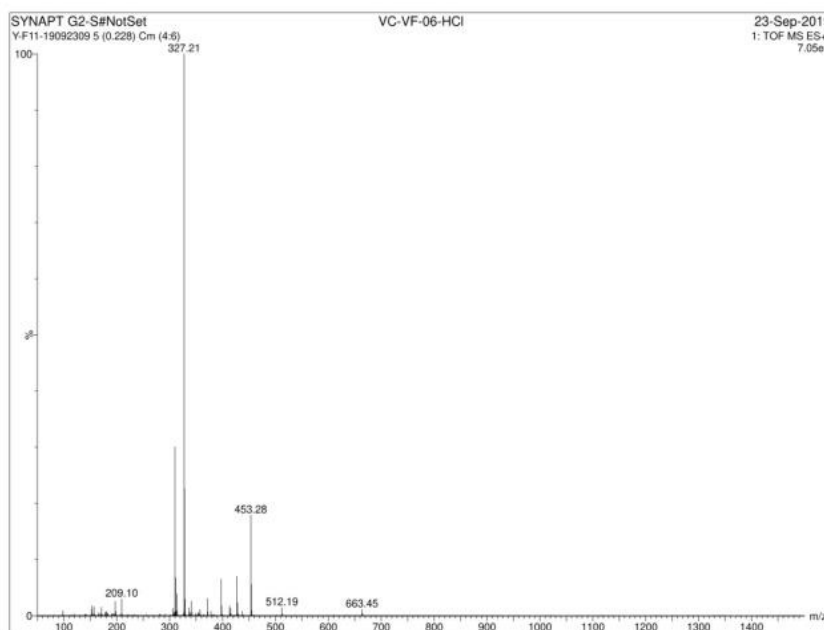

<sup>1</sup>H-NMR (CDCl<sub>3</sub>, 500 MHz)

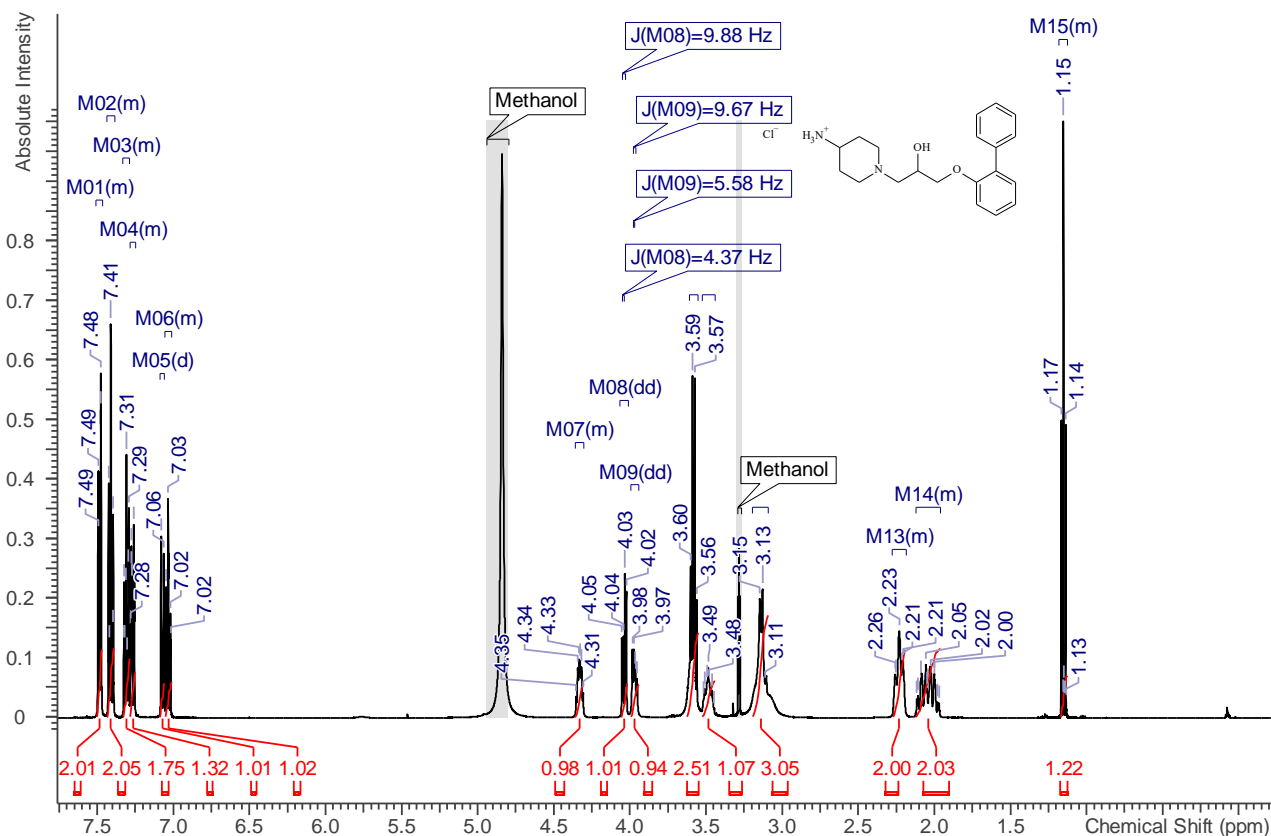

<sup>13</sup>C-NMR (CDCl<sub>3</sub>, 126 MHz)

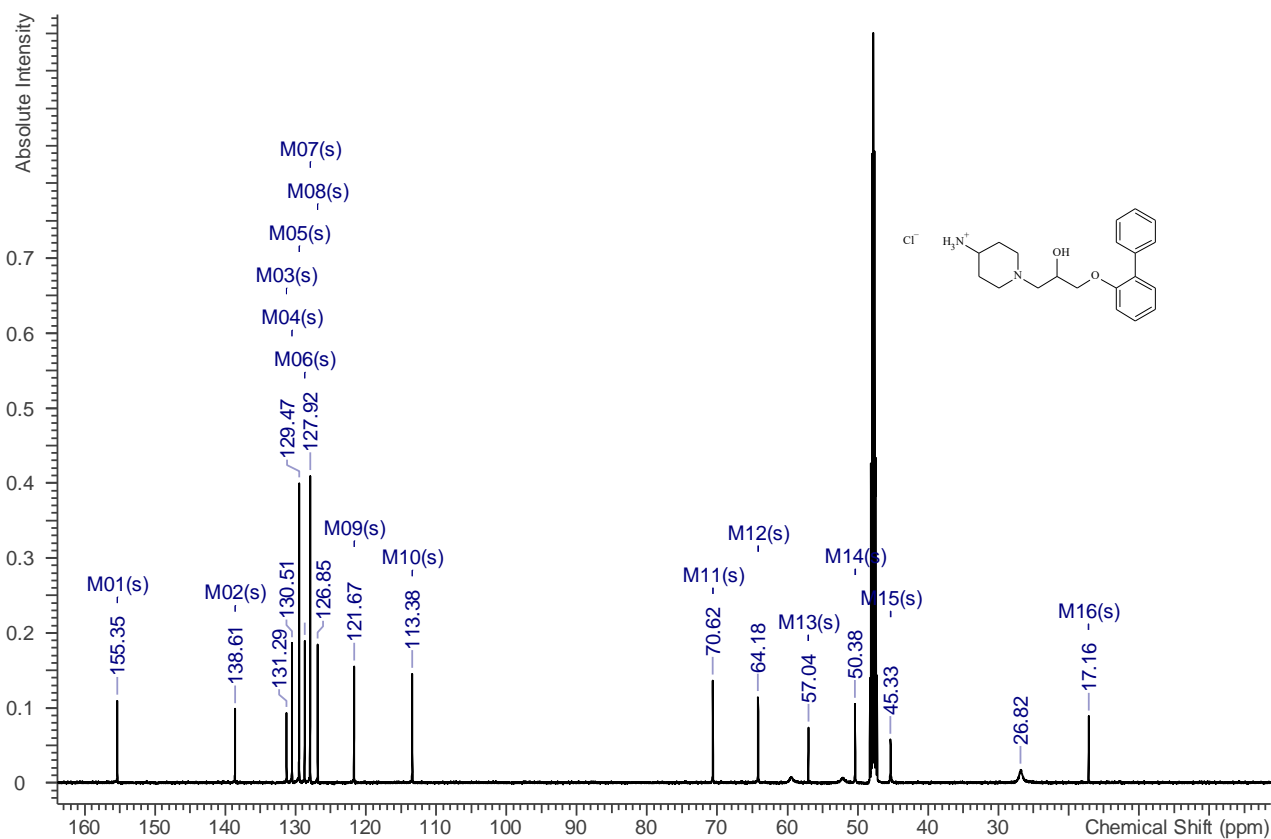

3-Chloro-N-(1-(3-([1,1'-biphenyl]-2-yloxy)-2-hydroxypropyl)piperidin-4-yl)-benzene sulfonamide  
(5a)

HRMS

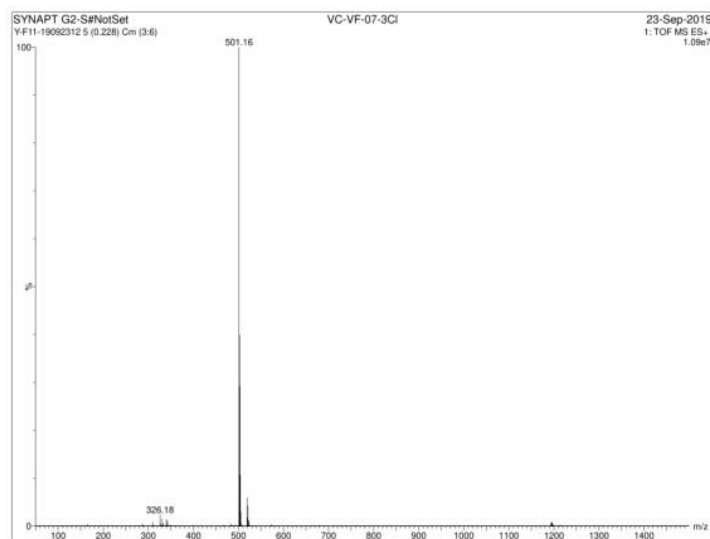

<sup>1</sup>H-NMR (CDCl<sub>3</sub>, 500 MHz)

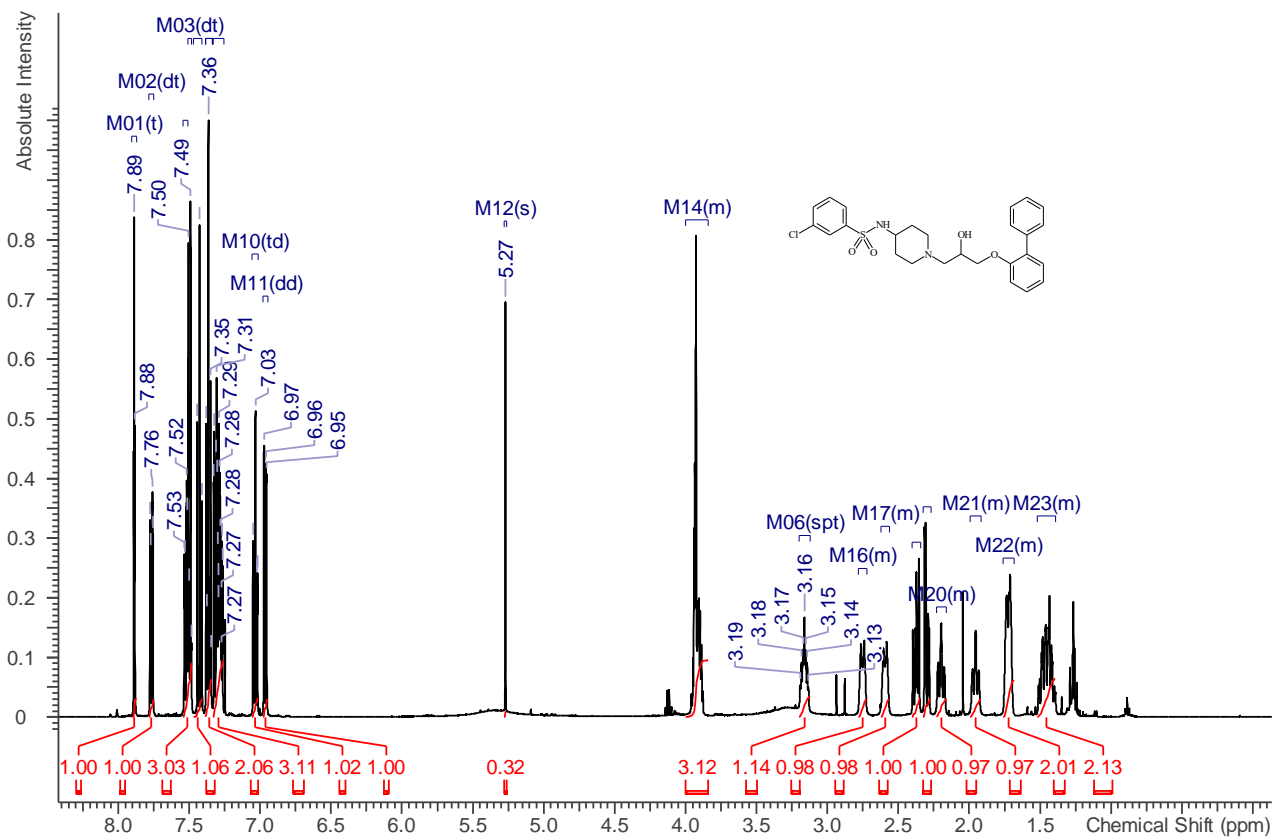

<sup>13</sup>C-NMR (CDCl<sub>3</sub>, 126 MHz)

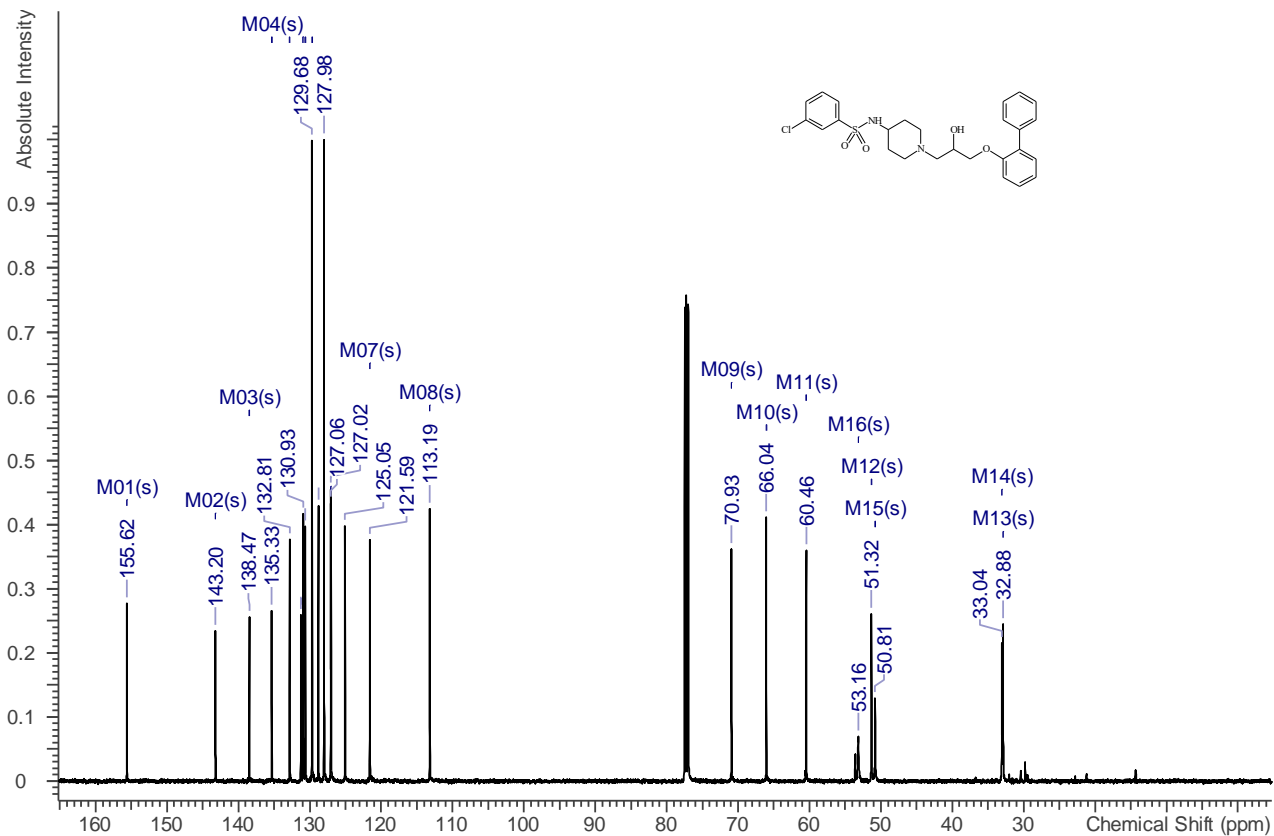

*N*-(1-(3-([1,1'-Biphenyl]-2-yloxy)-2-hydroxypropyl)piperidin-4-yl)benzenesulfonamide (**5b**)

HRMS

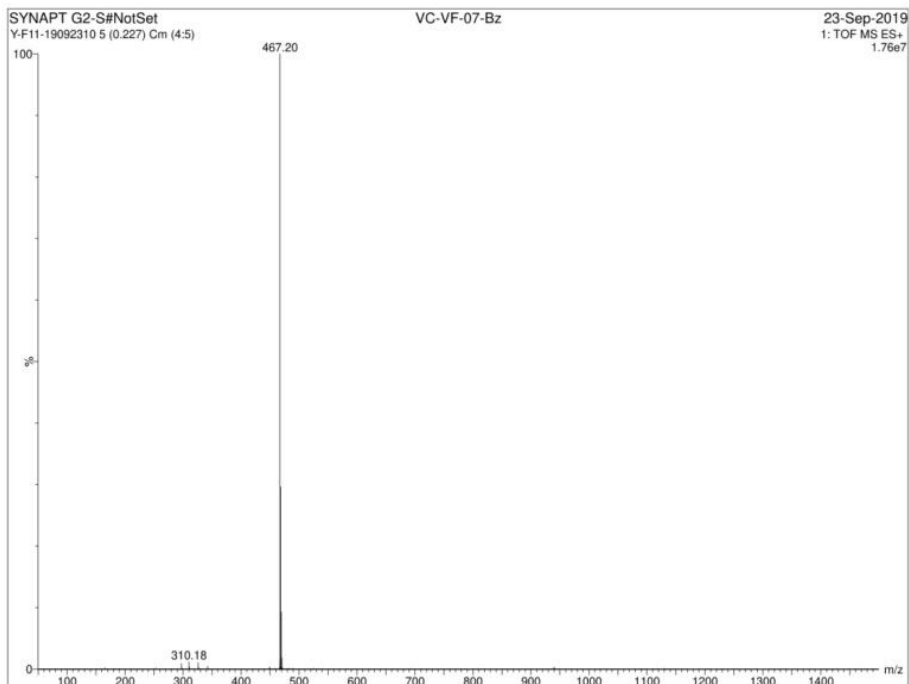

<sup>1</sup>H-NMR (CDCl<sub>3</sub>, 500 MHz)

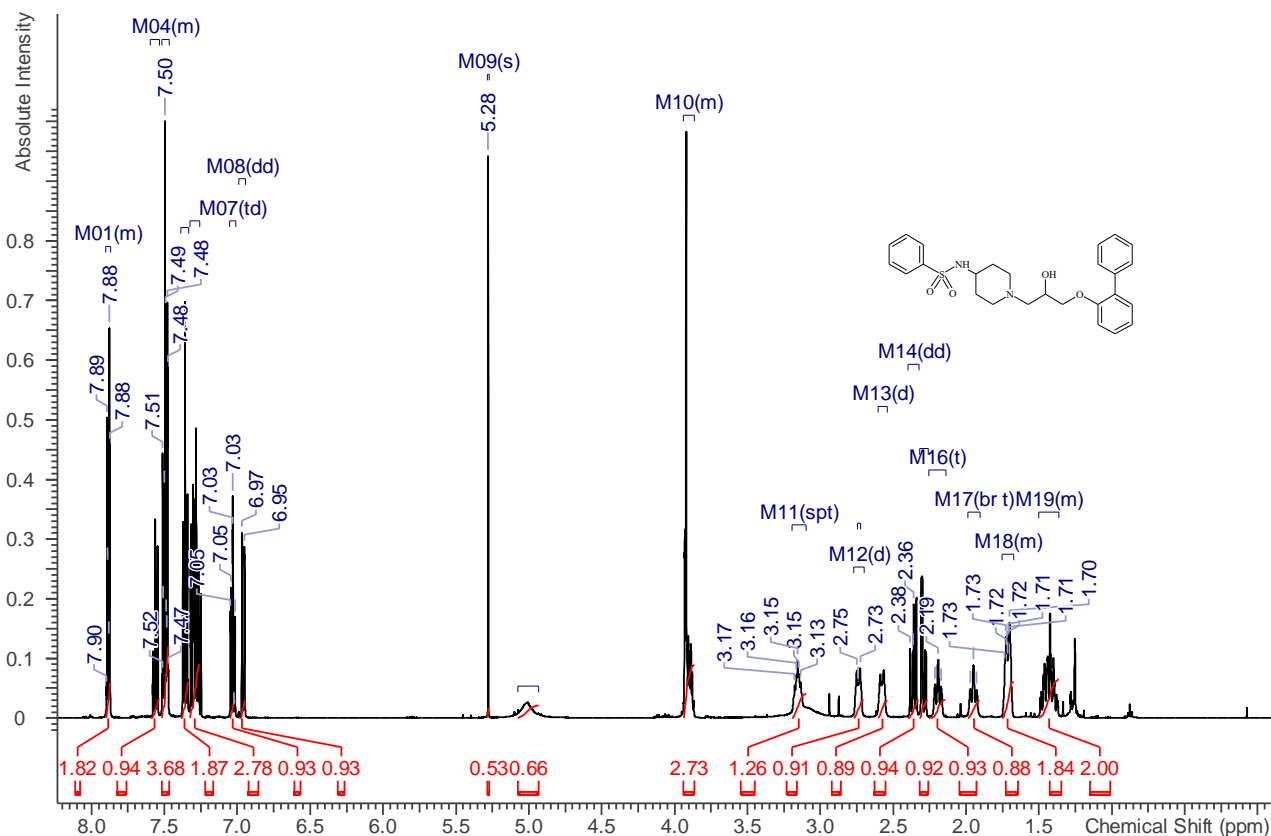

<sup>13</sup>C-NMR (CDCl<sub>3</sub>, 126 MHz)

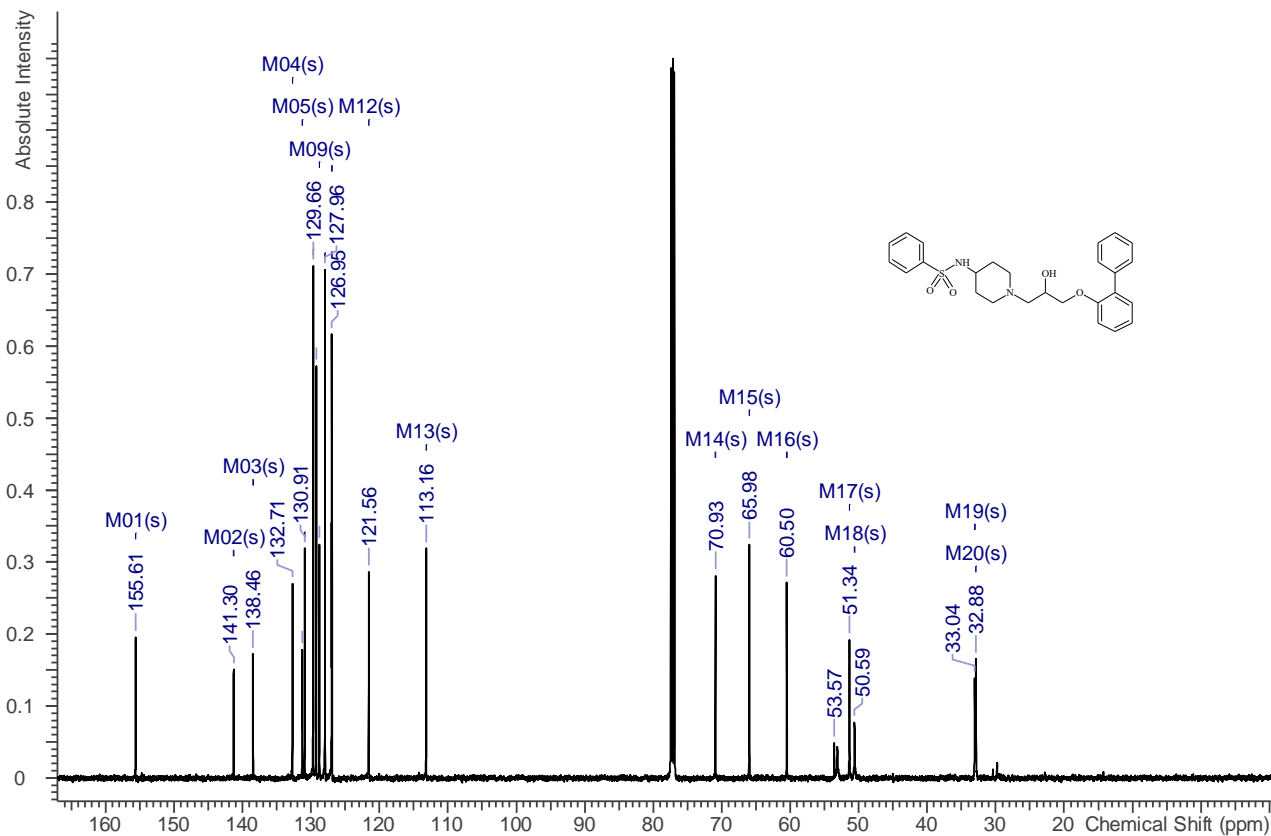



2-Fluoro-N-(1-(3-([1,1'-biphenyl]-2-yloxy)-2-hydroxypropyl)piperidin-4-yl)-benzene sulfonamide  
(5c)

HRMS

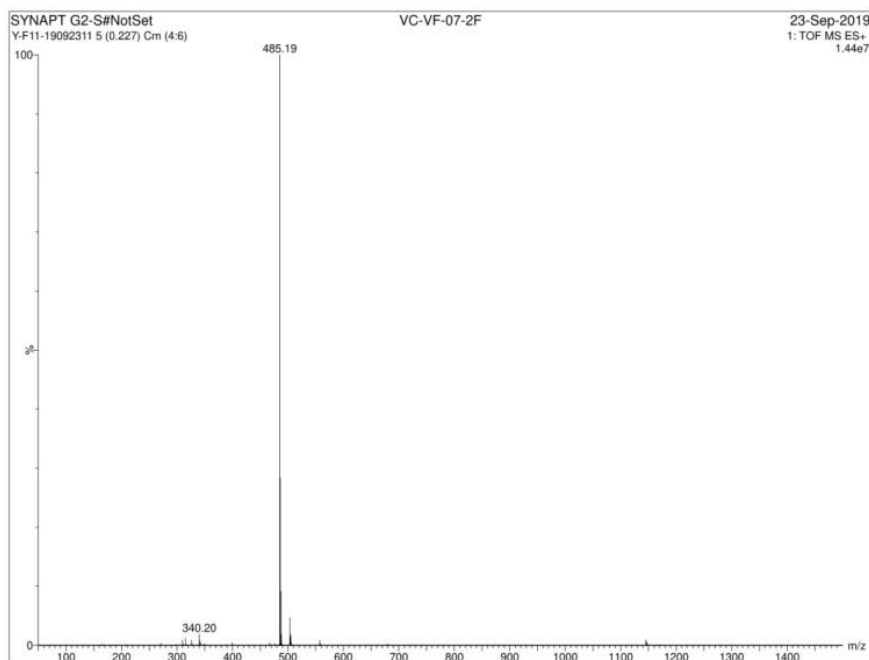

<sup>1</sup>H-NMR (CDCl<sub>3</sub>, 500 MHz)

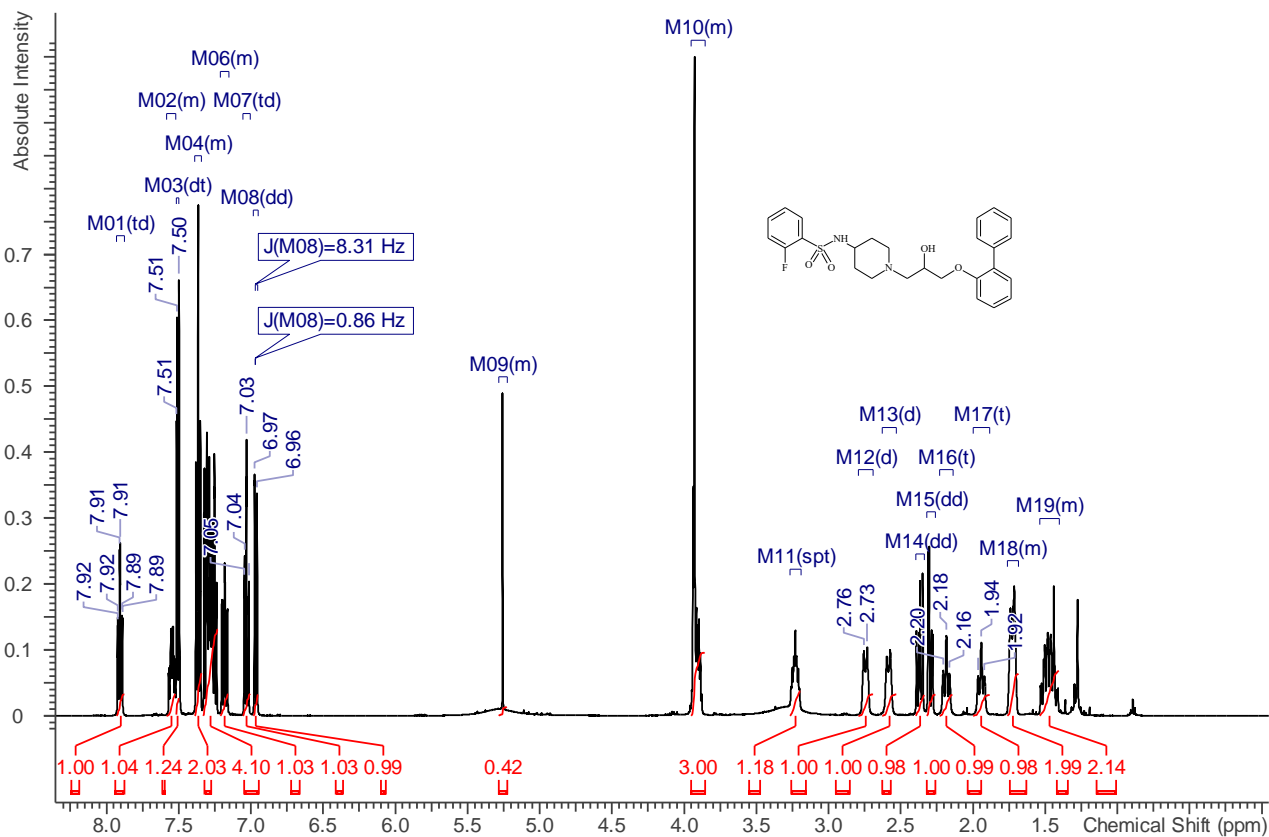

<sup>13</sup>C-NMR (CDCl<sub>3</sub>, 126 MHz)

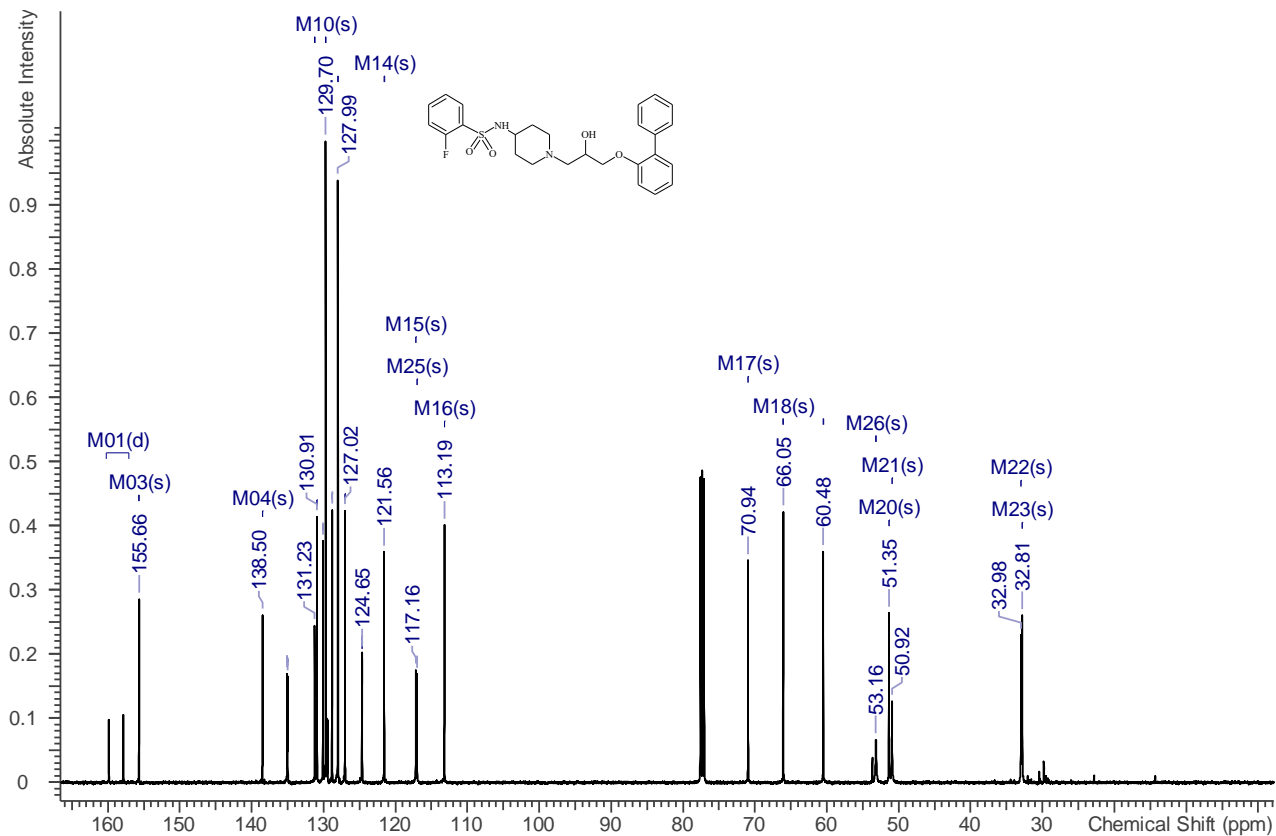

*3-Methoxy-N-(1-(3-([1,1'-biphenyl]-2-yloxy)-2-hydroxypropyl)piperidin-4-yl)-benzene sulfonamide (5d)*

HRMS

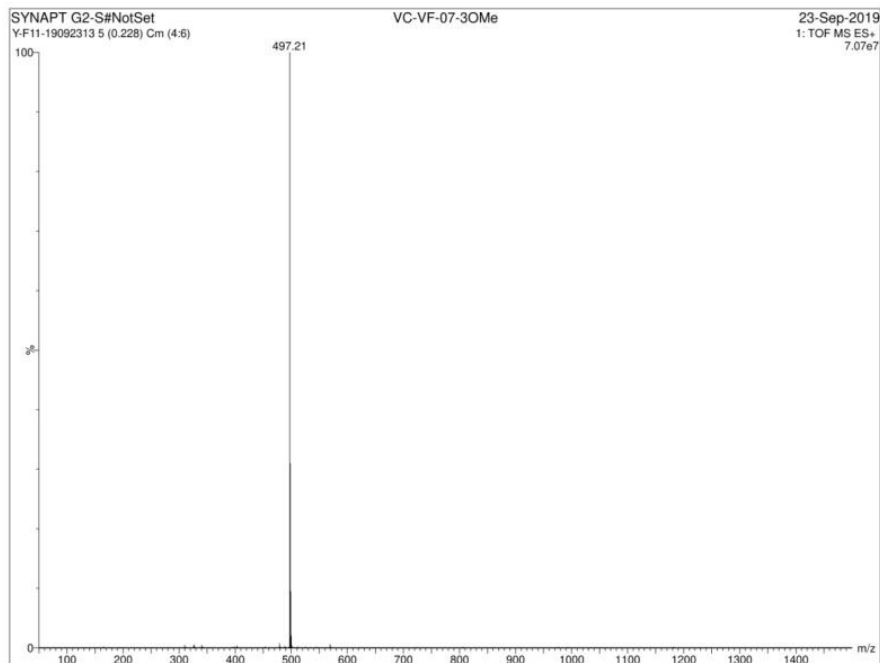

<sup>1</sup>H-NMR (CDCl<sub>3</sub>, 500 MHz)

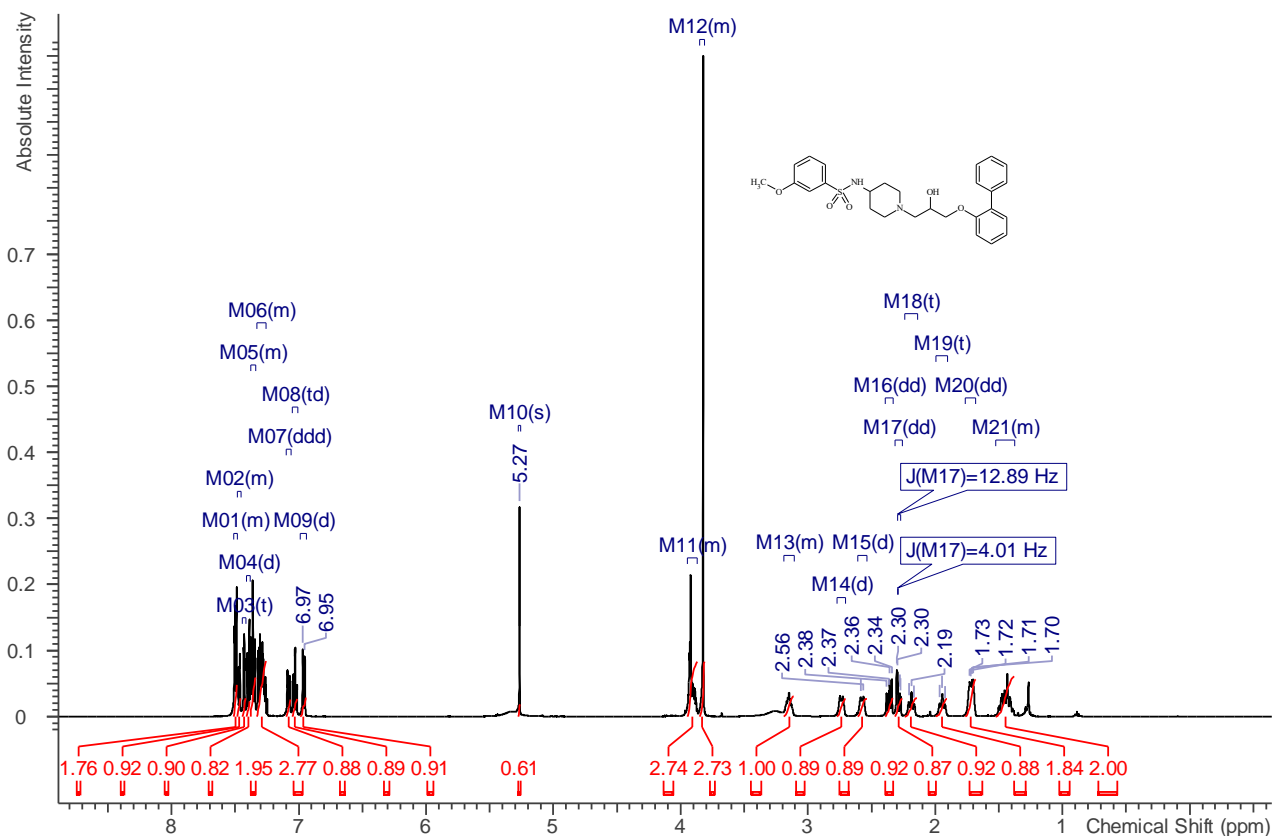

<sup>13</sup>C-NMR (CDCl<sub>3</sub>, 126 MHz)

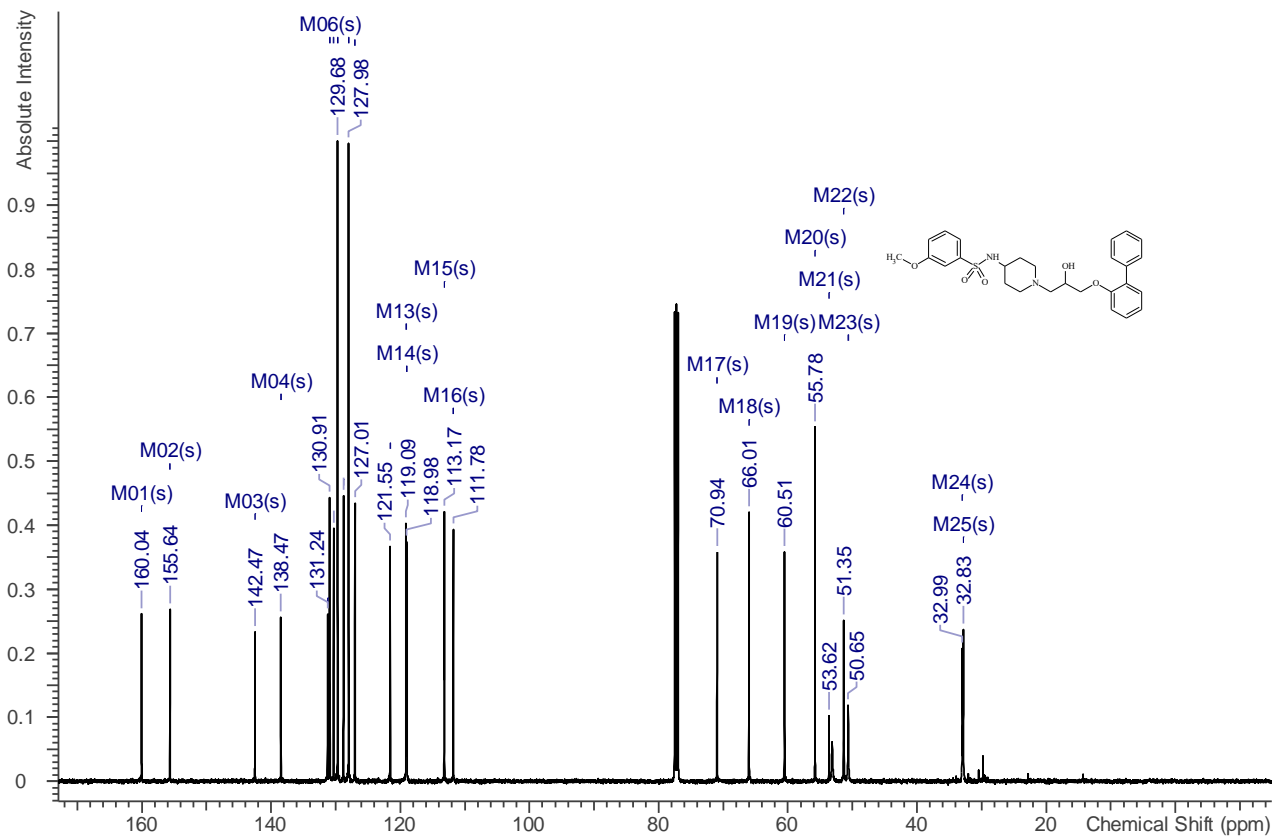

4-Nitro-N-(1-(3-([1,1'-biphenyl]-2-yloxy)-2-hydroxypropyl)piperidin-4-yl)-benzene sulfonamide  
(5e)

HRMS

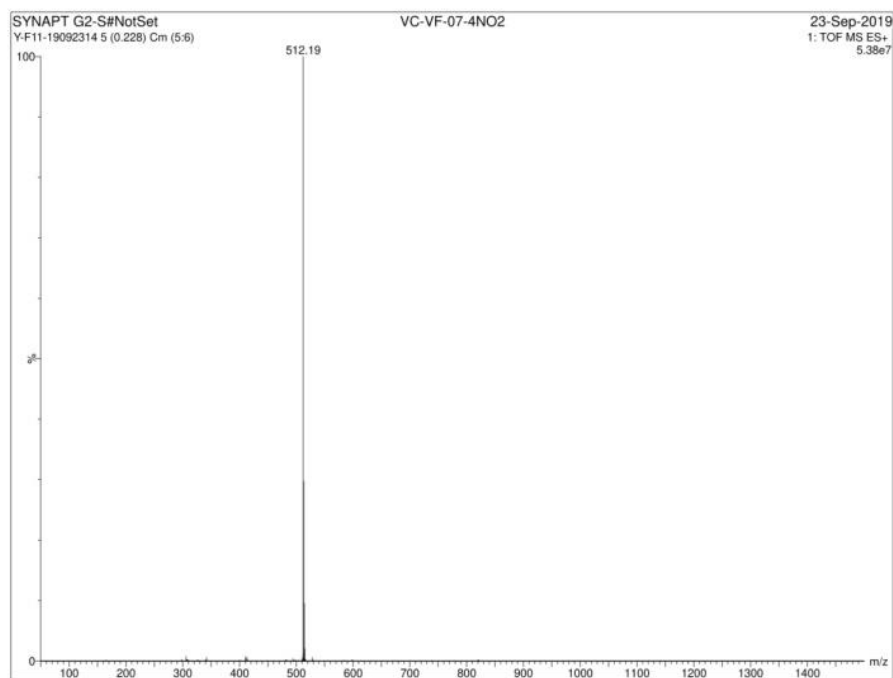

<sup>1</sup>H-NMR (CDCl<sub>3</sub>, 500 MHz)

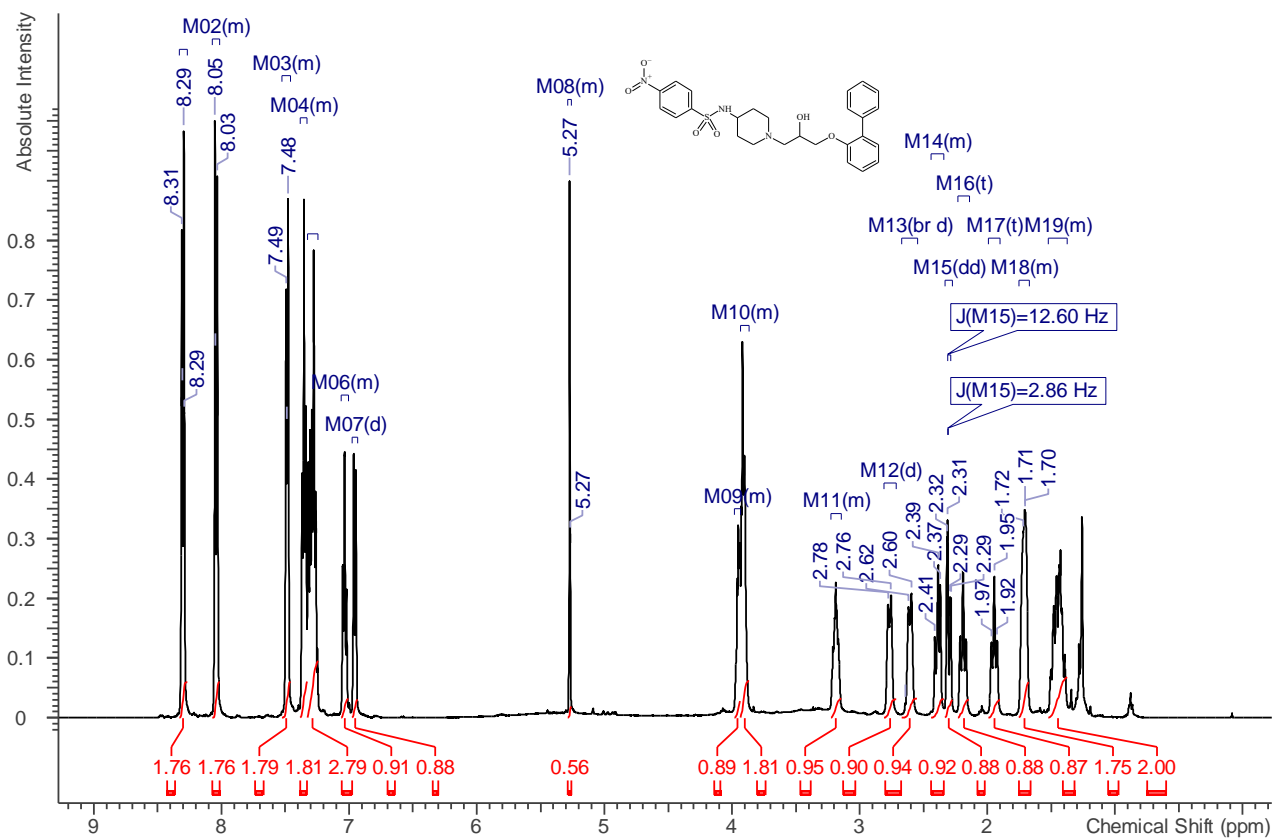

$^{13}\text{C}$ -NMR ( $\text{CDCl}_3$ , 126 MHz)

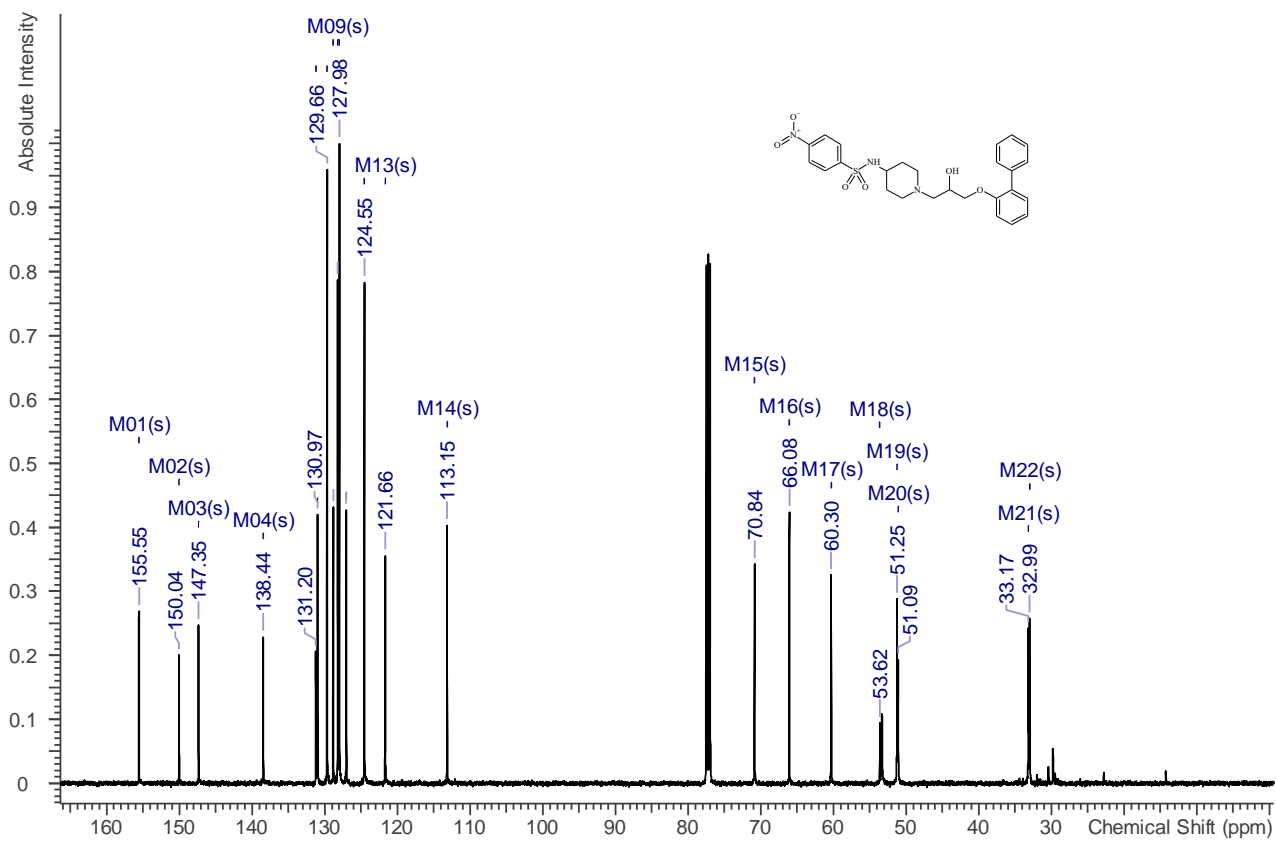

#### IV. References

- [1] Roschangar, F.; Sheldon, R.A.; Senanayake, C.H. Overcoming barriers to green chemistry in the pharmaceutical industry – the Green Aspiration Level™ concept, *Green Chem.*, **2015**, *17*, 752–768.
- [2] Van Aken, K.; Streckowski, L.; Patiny, L. EcoScale, a semi-quantitative tool to select an organic preparation based on economical and ecological parameters. *Beilstein J. Org. Chem.*, **2006**, *2*, No 3.
- [3] Canale, V.; Partyka, A.; Kurczab, R.; Krawczyk, M.; Kos, T.; Satała, G.; Kubica, B.; Jastrzębska-Więsek, M.; Wesołowska, A.; Bojarski, A.J.; Popik, P.; Zajdel, P. Novel 5-HT<sub>7</sub>R antagonists, arylsulfonamide derivatives of (aryloxy) propyl piperidines: Add-on effect to the antidepressant activity of SSRI and DRI, and pro-cognitive profile. *Bioorg. Med. Chem.* **2017**, *25*, 2789–2799.
- [4] Hofer, A.; Cremosnik, G.S.; Müller, A.C.; Giambruno, R.; Trefzer, C.; Superti-Furga, G.; Bennett, K.L.; Jessen, H.J. A Modular Synthesis of Modified Phosphoanhydrides. *Chem. Eur. J.* **2015**, *21*, 10116–10122.
